1                   **Cellular and molecular mechanisms of frontal bone development in**  
2                                   **spotted gar (*Lepisosteus oculatus*)**

3  
4  
5  
6  
7                   Alyssa Enny<sup>a</sup>, Andrew W. Thompson<sup>b,c</sup>, Brett Racicot<sup>b</sup>, Ingo Braasch<sup>b,c</sup>,  
8                                   and Tetsuya Nakamura<sup>a,1</sup>

9  
10  
11  
12  
13 **Authors affiliations**

14 <sup>a</sup> Department of Genetics, Rutgers the State University of New Jersey, Piscataway, NJ, 08854,  
15 USA

16 <sup>b</sup> Department of Integrative Biology and <sup>c</sup>Program in Ecology, Evolution, and Behavior (EEB),  
17 Michigan State University, East Lansing, MI, 48824, USA

18  
19  
20  
21  
22 <sup>1</sup> Address correspondence to: Tetsuya Nakamura, Department of Genetics, Rutgers the State  
23 University of New Jersey, Piscataway, LSB 224, 145 Bevier Rd, Piscataway, NJ, 08854.  
24 Phone: (848) 445-7191; e-mail: [nakamura@dls.rutgers.edu](mailto:nakamura@dls.rutgers.edu)

25  
26  
27  
28 **Running title:** Frontal bone development in spotted gar

29  
30 **Keywords:** spotted gar, frontal bone, dermal ossification, mesenchymal cell condensation

31

32 **Abstract**

33

34

35 **Background:** The molecular mechanisms initiating vertebrate cranial dermal bone formation is a  
36 conundrum in evolutionary and developmental biology. Decades of studies have determined the  
37 developmental processes of cranial dermal bones in various vertebrate species, finding possible  
38 inducers of dermal bone. However, the evolutionarily derived characters of current experimental  
39 model organisms hinder investigations of the ancestral and conserved mechanisms of vertebrate  
40 cranial dermal bone induction. Thus, investigating such mechanisms with animals diverging at  
41 evolutionarily crucial phylogenetic nodes is imperative.

42

43 **Results:**

44 We investigated the cellular and molecular foundations of skull frontal bone formation in the  
45 spotted gar *Lepisosteus oculatus*, a basally branching actinopterygian. Whole-mount bone and  
46 cartilage stainings and hematoxylin-eosin section stainings revealed that mesenchymal cell  
47 condensations in the frontal bone of spotted gar develop in close association with the underlying  
48 cartilage. We also identified novel aspects of frontal bone formation: Upregulation of F-actin and  
49 plasma membrane in condensing cells, and extension of podia from osteoblasts to the frontal  
50 bone, which may be responsible for bone mineral transport.

51

52 **Conclusion:** This study highlights the process of frontal bone formation with dynamic  
53 architectural changes of mesenchymal cells in spotted gar, illuminating supposedly ancestral and  
54 likely conserved developmental mechanisms of skull bone formation among vertebrates.

55

56

57

58

59

60

61

62

## 63 1 | INTRODUCTION

64

65 The patterning and growth of cranial dermal bones in vertebrates are remarkably diverse  
66 and often reflect functionally different demands in various habitats<sup>1,2</sup>. The functional importance  
67 and complexity of cranial dermal bones in vertebrates are illustrated by the skull roof, which  
68 primarily protects the brain and sensory organs. More than 450 million years ago, large bony  
69 plates covered the primitive fish cranium for protection against predators. These plates, known as  
70 the macromeric condition, originated at the dorsal and ventral cranium in groups of ancient  
71 jawless fishes such as Arandaspida, Heterostraci, and Osteostraci<sup>3-5</sup>. Likewise, jawed fishes of  
72 the group Placodermi possessed large bony plates that covered the head and the anterior body  
73 trunk. The evolutionary relationship of Placodermi's bony plates that have a peculiar size and  
74 shape to the skull bones of other fishes is currently under investigation<sup>6-8</sup>. In the course of  
75 vertebrate evolution, a myriad of diverse dermal skull roof patterns were converged to the  
76 archetype represented by extant actinopterygians and sarcopterygians<sup>9</sup>. Despite centuries of  
77 anatomical studies, however, the genetic underpinnings of morphological diversity in the skull  
78 roof remain poorly understood<sup>10-15</sup>.

79 The evolutionary diversity of the skull roof could be revealed by identifying where and  
80 how ossification for each bone initiates in the embryonic head. During embryonic skull roof  
81 formation, mesenchymal cell condensations, which later differentiate to osteoblasts, form  
82 between the epidermis and endocranial cartilage, giving rise to the skull roof. A previous study  
83 in cichlid fishes used transmission electron microscopy to show that spindle-shaped cells among  
84 ubiquitously distributed mesenchymal cells congregate with gap junctions and form  
85 mesenchymal cell condensations<sup>16</sup>. Gap junctions are indispensable for the ossification process,  
86 presumably allowing diffusion of ions or small signaling molecules between condensing cells to  
87 induce osteoblast differentiation for skull roof<sup>17-20</sup>. The cranial dermal bones ossify exclusively  
88 with osteoblasts, thus lacking the chondrocytes present in endochondral ossification, and  
89 undergo what is referred to as intramembranous ossification<sup>21-23</sup>.

90 The molecular mechanisms that induce mesenchymal condensations for cranial dermal  
91 bone ossification remain enigmatic<sup>24</sup>. Historical studies identified their close localization with  
92 lateral line neuromasts<sup>25-28</sup>, endocranial cartilage<sup>2,23,29</sup>, and epithelial tissues<sup>23,24,30</sup>. However,  
93 there is no decisive evidence to conclude that these tissues induce mesenchymal cell

94 condensations for cranial dermal bones. In early studies, close association of cranial dermal  
95 bones with lateral lines in extinct and extant taxa suggests that chemical signals or cell  
96 migrations from neuromasts stimulate the formation of mesenchymal condensations during  
97 cranial dermal bone development<sup>31–33</sup>. However, other studies have been reluctant to support this  
98 lateral line hypothesis, recognizing close topology between the cranial dermal bones and lateral  
99 lines as a developmental coincidence<sup>24</sup>. As such, laser removal of neuromasts from the lateral  
100 line housed in the infraorbital bones does not affect overall shape of the infraorbital bones<sup>34</sup>.

101       Recent mouse studies have shed light on the functional necessity of epithelial cells in  
102 initiation of skull roof formation. Secreted signaling proteins fibroblast growth factors 8 and 10  
103 (Fgf8 and Fgf10) are expressed in facial ectodermal cells (epithelial cells)<sup>35,36</sup>, and their receptor  
104 Fgfr2 is expressed in underlying mesenchymal cells<sup>37</sup>. Conditional deletion of *Fgfr2* in the  
105 mesenchymal cell layer by *Dermo1:cre* results in malformed skull roof bones<sup>37</sup>, implying that  
106 Fgf8, Fgf10, and presumably other Fgf ligands regulate skull roof ossification processes via  
107 diffusion from the ectoderm to mesenchymal cells. Along with Fgf ligands, various Wnt ligands  
108 are expressed in the facial ectoderm<sup>38</sup>. Deletion of *Wntless (Wls)*, a Wnt ligand transporter<sup>38</sup>, in  
109 an ectoderm-specific manner causes arrest of osteoblast differentiation but has no effect on  
110 osteoblast proliferation in mouse. This phenotype implies that Wnt ligands expressed in the  
111 ectoderm diffuse into the mesenchymal cell layer with Wls and regulate cranial dermal bone  
112 formation<sup>38</sup>.

113       The skull roof develops via dermal ossification, in which cranial mesenchymal cells  
114 directly differentiate into osteoblasts<sup>39</sup>. Despite a significant number of studies on skull roof  
115 development using diverse model organisms with evolutionarily derived features<sup>40</sup>, the ancestral  
116 conditions of skull roof developmental mechanisms are relatively unexplored. Prior studies have  
117 used whole-mount bone staining and sectioning to describe the developmental process of skull  
118 roof formation in basal actinopterygian fishes including the holosteans gar (*Lepisosteidae*) and  
119 bowfin (*Amia calva*), which hold a phylogenetically prominent position in vertebrate evolution  
120 as an outgroup to teleost fishes<sup>31,32</sup>. However, investigation of the structure and developmental  
121 mechanisms of the skull roof in these basal actinopterygians at higher resolution is critical to  
122 better elucidate the ancestral and shared mechanisms of this process.

123       Thus, we used the holostean spotted gar (*Lepisosteus oculatus*), which retains a genome  
124 structure that is more comparable to the genomes of sarcopterygian vertebrates including humans

125 than to those of teleost fishes<sup>41</sup>. The genome of the spotted gar has not undergone the teleost-  
126 specific genome duplication as developmental models like zebrafish and medaka did. In addition,  
127 the very slow morphological and molecular evolutionary rates of gar make it an important model  
128 to infer ancestral molecular mechanisms responsible for skull roof formation. We conducted  
129 single-cell analysis of frontal bone formation, one of skull roof bones, in spotted gars with fine  
130 hematoxylin and eosin (HE) staining, 3D reconstruction, and cytoskeleton and plasma membrane  
131 staining. The results redefine the processes involved in frontal bone development and highlight  
132 novel mesenchymal cell behavior during frontal bone development. This newly obtained  
133 knowledge will serve as a basis for future molecular and genetic studies of basal actinopterygian  
134 skull development, illuminating supposedly ancestral and shared developmental mechanisms of  
135 skull formation among the diversity of vertebrates.

136

## 137 **2 | Results**

### 138 **2.1 | Development of the skull bones in spotted gar**

139 To investigate developmental mechanisms of the gar skull roof in detail, we first re-  
140 examined developmental processes of the skull bones including the frontal bone. To accomplish  
141 this, we used acid-free bone and cartilage staining, which stains calcification with higher  
142 sensitivity than canonical bone staining methods<sup>42</sup>. Until 20 mm total length (TL), we did not  
143 find any evidence for the frontal bone or other skull roof bone development (data not shown). At  
144 21 mm total length (TL), premaxillary, maxillary, and ectopterygoid bones (dermal bones) were  
145 stained by alizarin red S (Figure 1A, B). The parasphenoid, which lies at the roof of the mouth,  
146 extended to the anterior extremity of the head. Anterior to the pectoral fin, a series of pectoral  
147 girdle bones (extrascapular, supracleithrum, and cleithrum) extended from the posterior skull to  
148 the ventral edge of the body (Figure 1B). A transparent thickened anlage for the frontal bone was  
149 observed dorsal to the eye under a stereo-type microscope, yet alizarin red S staining for this  
150 anlage was not observed (Figure 1B'). This is consistent with previously defined developmental  
151 stages of gar skull bones<sup>31,32,43</sup>.

152 At 25 mm TL, cranial dermal bones, including premaxillary, dentary, and ectopterygoid  
153 bones, are further ossified (Figure 1C, D). The parasphenoid posteriorly reached the vertebral  
154 column and was more ossified at the 25 mm TL stage compared to the 21 mm TL stage (Figure  
155 1C). At 25 mm TL, the frontal bone was clearly stained by alizarin red S (Figure 1D). The frontal

156 bone developed dorsally to the supraorbital cartilage, a dorsal endocranial cartilage encasing the  
157 eye (Figure 1D'). The frontal bone stretched along the anteroposterior axis, and the anterior  
158 extremity was located close to the posterior end of the premaxillary bone. Alzarin red S staining  
159 for the frontal bone was strongest dorsal to the eye, and staining became weaker as it extended in  
160 anterior and posterior directions, indicating that frontal bone ossification starts with  
161 mesenchymal cells located dorsally to the eye.

162 At 28 mm TL, lacromaxillary bones were aligned lateral to the ectopterygoid bone  
163 (Figure 1E). The premaxillary bone extended posteriorly and approached the anterior end of the  
164 frontal bone (Figure 1E). The frontal bone slightly extended more to the anterior and posterior  
165 direction compared to 25 mm TL (Figure 1E, F). At this stage, the frontal bone became wider  
166 around the eye region (Figure 1E, F'). The preopercular bone started to ossify posteroventral to  
167 the eye.

168 At 42 mm TL, frontal and premaxillary bones further developed along the anteroposterior  
169 axis and could be distinguished under a stereomicroscope (Figure 1G). Posterior to the frontal  
170 bone, the parietal bone developed from multiple independent ossification centers (Figure 1G, H,  
171 H'). Frontal and parietal bones were separated by a distinct gap between them. Also, the  
172 supratemporal bone developed posterior to the frontal bone and lateral to the parietal bone  
173 (Figure 1H, H'). The posterior half of the frontal bone became wider than the anterior half.

174 Finally, at 49 mm TL, the frontal bone fully developed, with its posterior extremity  
175 between the parietal and supratemporal bones (Figure 1I, J'). The originally separated parietal  
176 bones fused with each other and constructed a large, flat osseous plate that dorsally covered the  
177 head (Figure 1I, J'). Supratemporal and preopercular bones ossified more compared to the  
178 previous 42 mm TL stage (Figure 1J, J'). Posterior to the angular bone, the quadratojugal bone  
179 started to develop (Figure 1J). For all stage juveniles, three individuals were investigated.

180 Overall, the observed acid-free bone and cartilage staining in spotted gar was consistent  
181 with previously published data<sup>32,43</sup> and serves as a precise developmental staging series for  
182 subsequent fine analysis of gar skull roof development.

183

184 **2.2 | 3D reconstruction of topology of the frontal bone, endocranial cartilage, and**  
185 **neuromasts**

186 Prior studies in actinopterygians and sarcopterygians suggest that the frontal bone  
187 develops in the mesenchymal layer in close proximity to the underlying endocranial cartilage,  
188 epithelial cells, and lateral line neuromasts, positing these tissues as inducers of mesenchymal  
189 cell condensations<sup>33,44,45</sup>. However, the functional roles of these tissues in the initiation of  
190 mesenchymal condensations remain poorly understood. To precisely characterize topology of the  
191 frontal bone anlage and its possible inducers in spotted gar, we reconstructed the 3D morphology  
192 of the frontal bone anlage, endocranial cartilage, and neuromasts from HE-stained paraffin  
193 sections using Amira 3D analysis software.

194 At 14 mm TL, there was no indication of mesenchymal cell condensations for the frontal  
195 bone (Supplementary Figure 1A, A'). Supraorbital cartilage and neuromasts were observed  
196 dorsal to the eye.

197 At 17 mm TL, fragmented frontal bone anlagen were observed dorsal to the supraorbital  
198 cartilage (Figure 2A). This indicates that formation of anlagen for the frontal bone actually  
199 occurred earlier than the ossification stage identified by bone staining (Figure 1C, 25 mm TL  
200 stage, see above). Some of these anlagen were right under the neuromasts in the supraorbital  
201 lateral line (Figure 2A'). This result is consistent with previous teleost and non-teleost  
202 actinopterygian studies asserting that mesenchymal cell condensations for the frontal bone  
203 develop in close proximity to neuromasts in the supraorbital lateral line<sup>2,29,33</sup>. However, the other  
204 anlagen did not develop right below the neuromasts (Figure 2A'). At a more lateral position of  
205 the head, fragmented mesenchymal cell condensations also developed close to the neuromasts,  
206 yet these condensations were not right under the neuromasts either (Supplementary Figure 1B,  
207 B').

208 At 20 mm TL, frontal bone anlagen fused with each other and extended along the  
209 anteroposterior axis. These anlagen were located dorsal to the supraorbital cartilage, which  
210 encases the eye (Figure 2B, B'). Although the frontal bone anlage developed in close proximity  
211 to the neuromasts, positions of the neuromasts and frontal bone anlage did not precisely match  
212 (Fig. 2B'). In addition, the frontal bone anlage expanded laterally and posteriorly, independent of  
213 neuromasts (Figure 2B').

214 At 25 mm TL, the frontal bone anlage became a thin and flat osseous plate that dorsally  
215 covered the supraorbital cartilage. The frontal bone was located under the neuromasts, although  
216 the edge of the bone extended laterally without neuromasts. Also, the bone significantly

217 extended in anterior and posterior directions, which did not seem to correlate with neuromast  
218 positions (Figure 2C, C'). For all stage juveniles, two individuals were investigated.

219 Overall, these results support the assertion that the proximity of neuromasts and  
220 ossification centers for cranial dermal bones is a developmental coincidence and not causally  
221 linked<sup>24</sup>, at least in spotted gar.

222

### 223 **2.3 | Cellular basis of frontal bone development**

224 To further scrutinize the process of frontal bone development, HE-stained paraffin  
225 sections of gar juveniles from 14 mm TL to 25 mm TL were observed at single-cell resolution  
226 (Figure 3).

227 At 14 mm TL, cranial mesenchymal cells were uniformly distributed between the  
228 basement membrane of epithelial cells and underlying endocranial cartilage without any signs of  
229 mesenchymal condensations for the frontal bone (Figure 3A–C). Mesenchymal cells stretched  
230 and extended long podia from the cell body, contacting each other at peripheral regions. At this  
231 stage, no signatures of osteoblast differentiation were discerned, at least at the morphological  
232 level (Figure 3B, C).

233 At 17 mm TL, the frontal bone started to develop dorsal to the supraorbital cartilage  
234 (Figure 3D). The bone matrix, surrounded by osteoblasts, was dorsoventrally thin (Figure 3E).  
235 Interestingly, at the more lateral position of the head, the early stage of mesenchymal  
236 condensations was discerned. Some mesenchymal cells became cuboidal and started  
237 congregating with each other dorsally to the endocranial cartilage (Figure 3F, G). Each  
238 condensation was a dorsoventral single-cell layer consisting of 2–10 cells. These cell  
239 condensations seemed to extend along the anteroposterior axis, recruiting mesenchymal cells to  
240 their extremities. In the condensations, cellular membranes of adjacent cells tightly contacted  
241 each other (Figure 3G), implying that the cells were interlinked by microscale architectures, such  
242 as gap junctions, which are indispensable for osteoblast differentiation<sup>17,46</sup>. Intriguingly,  
243 observing other sections in the same embryo or sections in different embryos at 17 mm TL, we  
244 could also identify slightly different stages of frontal bone development (Figure 3H, I). After  
245 mesenchymal cells started condensing, a small space was created inside the cell condensations  
246 (Figure 3H). Subsequently, bone matrix was produced into this space (Figure 3I). Contrary to a



247 previous finding in bowfin<sup>33</sup>, a break of the basal membrane of the epidermis and subsequent cell  
248 migration from the neuromasts to the mesenchymal layer was not confirmed<sup>33</sup>.

249 At 20 mm TL, the frontal bone extended along the anteroposterior axis (Figure 3J). At  
250 this point, the frontal bone was a flat osseous plate surrounded by osteoblasts and grew adjacent  
251 to the supraorbital cartilage. A relatively small number of osteoblasts were observed in the  
252 middle part of the frontal bone compared to anterior and posterior extremities (Figure 3K, L).

253 At 25 mm TL, the frontal bone further developed and was strongly stained by alizarin red  
254 S (Figure 3M, N). The frontal bone delineated the supraorbital cartilage more than the basement  
255 membrane of epithelial cells (Figure 3M). Intriguingly, osteoblasts protruded podia to the bone  
256 matrix, implying that they communicate with the bone matrix via podia and regulate ossification  
257 (Figure 3O). 2 replicates (different individuals) were observed for each stage/observation.

258

## 259 **2.4 | Cytoskeletal and membranous changes during ossification**

260 Dermal ossification starts with the formation of mesenchymal cell condensations<sup>47</sup>.  
261 Multiple molecular markers for condensing cells, such as NCAM or fibronectin, were identified  
262 in previous studies<sup>48</sup>. However, cytoskeleton and plasma membrane changes in condensing cells  
263 remain poorly described. Therefore, we investigated F-actin (cytoskeleton) by phalloidin and the  
264 plasma membrane by membrane staining at the initiation of cell condensation. At 17 mm TL  
265 when mesenchymal cells start to aggregate for the frontal bone, 2–3 cells in the condensations  
266 showed significantly enriched F-actin staining (Figure 4A, B, n = 5). The spatial distribution of  
267 the cells with the enrichment of F-actin seems to be stochastic in the mesenchymal condensation  
268 (Figure 4B, C, D, n=5). Other cells in the condensations also displayed slightly higher F-actin  
269 signal than surrounding mesenchymal cells (Figure 4A, B). Intriguingly, aggregating cells had  
270 smaller and more condensed nuclei than surrounding mesenchymal cells (Figure 4E, I, n = 5).  
271 The DAPI staining displayed that DNA was unevenly distributed in these nuclei, implying that  
272 chromatin structure is rapidly changing, which highly likely affects the differentiation state of  
273 these cells via gene expression changes (Figure 4E, inset). Cells with the enriched F-actin signal  
274 also exhibited strong staining of the plasma membrane, indicating that the amount or  
275 composition of membrane components (e.g., phospholipids) also changes (Figure 4F-H, n = 5).  
276 Although both F-actin and plasma membrane were enriched in the same cells, the high-  
277 magnification observation showed that these two signals did not spatially overlap in the cells,

278 implying that cytoskeletal and membranous changes may be independent or indirectly linked  
279 pathways (Figure 4H, inset).

280

### 281 **3 | DISCUSSION**

#### 282 **3.1 | Possible mechanisms that induce mesenchymal cell condensations for the frontal bone**

283 The position and size of each cranial dermal bone underpin the evolutionary diversity of  
284 fish skulls. As the positions of cranial dermal bones are determined by the initial mesenchymal  
285 condensations, identifying the main inducers of mesenchymal condensations is imperative to  
286 understanding fish skull diversity. Despite the critical need to uncover these mechanisms,  
287 determining the ancestral and shared processes for cranial dermal bone induction can be difficult  
288 using model organisms due to evolutionarily derived developmental characteristics<sup>49</sup>. Therefore,  
289 we used spotted gar as an experimental model<sup>41</sup>, a basally branching actinopterygian that likely  
290 retains the ancestral molecular mechanisms of fish skull roof formation. HE section staining of  
291 spotted gar juveniles showed that mesenchymal condensations developed in the uniformly  
292 distributed cranial mesenchymal cells, which were dorsoventrally flanked by the epidermis and  
293 underlying endocranial cartilage (Figure 3). The initial mesenchymal cell condensations were  
294 spatially fragmented and developed as dorsoventral single-cell layers, which are evidently  
295 isolated from the epidermis and endocranial cartilage. This finding is slightly different from the  
296 prior description of osteoblast differentiation in teleost, i.e. cichlid, frontal bone development,  
297 which showed that osteoblasts adjoin perichondral cells of the endocranial cartilage<sup>16</sup>.  
298 Additionally, our finding differs from the notion that epidermal cells migrate from neuromasts to  
299 the mesenchymal layer and probably form mesenchymal condensations in bowfin juveniles<sup>33</sup>.  
300 Given that mesenchymal condensations of the frontal bone initially develop well-isolated from  
301 the epidermis and endocranial cartilage in spotted gar, we suggest possible mechanisms to induce  
302 the mesenchymal condensations for the frontal bone below.

303

304 I ) Since Wnt and Fgf ligands expressed in the cranial ectoderm (epidermal layer) regulate  
305 differentiation of osteoblasts and chondrocytes in the cranial mesenchymal layer via protein  
306 diffusion<sup>38,50,51</sup>, distance from the ectoderm may be a determinant of osteoblast differentiation at  
307 a certain position in the mesenchymal layer. For example, mesenchymal cells adjacent to the  
308 ectoderm may receive an excessive dose of Wnt or Fgf signal, and/or cells adjacent to the

309 endocranial cartilage may receive an insufficient amount of signals. Expression levels of Wnts  
310 and Fgfs must be tightly regulated in vertebrate skull formation, and modification of their  
311 activities may produce the evolutionary diversity of frontal bone patterning.

312

313 II) In addition to diffusible molecules from the ectoderm to the mesenchymal layer, other  
314 diffusible molecules from the underlying meninges and cartilage, such as BMPs, regulate growth  
315 and patterning of the frontal bone condensation<sup>50,52</sup>. Single knockout of BMP genes in mice does  
316 not affect initial cell condensations for the frontal bone but disrupts frontal bone growth and  
317 patterning at later stages<sup>50,52</sup>. Thus, diffusible signals from both the epidermis and underlying  
318 cartilage may create dorsoventrally opposite signaling gradients and provide positional  
319 information to mesenchymal cells to initiate mesenchymal condensations.

320

321 III) Increase in the density of mesenchymal cells may autonomously create an uneven  
322 distribution of diffusible molecules or extracellular matrix in the cranial mesenchymal layer. As  
323 cranial mesenchymal cells proliferate, the concentration of secreted molecules from the  
324 mesenchymal cells themselves may become highest in the middle of the cranial mesenchyme  
325 layer. Intriguingly, mesenchymal stem cells are specified to osteoblasts with *Runx2* expression  
326 depending on the density of cells in in vitro collagen scaffolds<sup>53</sup>. Once a cell population achieves  
327 a density threshold during embryonic development, mesenchymal cells may differentiate into  
328 osteoblasts with a certain amount of diffusible molecules or extracellular matrix between the  
329 epidermis and supraorbital bone.

330

331 IV) Another possible mechanism to determine the position of mesenchymal cell condensations in  
332 the mesenchymal layer is mechanical force. A prior study in salmon (Salmonidae) suggested that  
333 mechanical force from the endocranial cartilage or the surface ectoderm may control frontal bone  
334 development<sup>54</sup>. Importantly, mesenchymal stem cells are reported to be specified to osteoblasts  
335 or adipocytes depending on cell shape<sup>55,56</sup>. Cell shape change triggers the Hippo-YAP signaling  
336 pathway<sup>57-61</sup>, which has been suggested to be a key player for osteoblast differentiation<sup>61</sup>.  
337 Although we have not tested whether cranial mesenchymal cells receive any mechanical  
338 pressure, change in the expression level of F-actin in the prospective osteoblasts may occur upon

339 physical cell–cell interaction or shear stress<sup>62</sup>. This hypothesis should be carefully examined in  
340 future studies.

341

### 342 **3.2 | Cell condensation forms in proximity to neuromasts, but not at the exact same** 343 **positions**

344 Previous studies in gar and bowfin have found mesenchymal cell condensations for the frontal  
345 bone under sensory organs in the epidermis<sup>31,32,63</sup>. Given the proximity of the cranial dermal  
346 bones to neuromast cells during development, some studies asserted that lateral line neuromasts  
347 may induce mesenchymal cell condensations for cranial dermal bones in fish<sup>44</sup>. Consistently, our  
348 HE-stained sections of gar juveniles indicated that neuromasts in the supraorbital line are in close  
349 proximity to mesenchymal condensations during frontal bone development. However, high  
350 resolution 3D topological analysis of neuromasts and frontal bone anlagen showed that the  
351 positions of the neuromasts and condensations do not dorsoventrally align, although they  
352 develop in a close manner. This observation is also consistent with observations in other studies  
353 in actinopterygians and crossopterygians that suggest that the close association between  
354 neuromasts and cranial dermal bones is a developmental coincidence<sup>64,65</sup>. Moreover, removal of  
355 neuromasts from the supraorbital line, which runs at the dorsal surface of the frontal bone, delays  
356 growth of the frontal bone without affecting initiation of frontal bone formation<sup>66</sup>. Collectively,  
357 neuromasts seem to be irrelevant to the induction of mesenchymal condensations for the frontal  
358 bone of spotted gar juveniles. However, close localization of neuromasts may affect frontal bone  
359 development, such as in the modification of bone growth via diffusible molecules or cell  
360 migration<sup>33</sup>. Intriguingly, a recent study in the caveform of the Mexican tetra *Astyanax*  
361 *mexicanus* discovered that ossification centers of the suborbital bones correspond with  
362 neuromast positions<sup>67</sup>. Also, evolutionary diversity of the suborbital bone in *Astyanax mexicanus*  
363 is correlated with neuromast distribution —this new finding may refuel the classical hypothesis  
364 or represent the evolutionarily derived mechanisms acquired in Mexican tetra. If neuromasts  
365 regulate frontal bone formation, further studies to identify the underlying mechanisms, such as  
366 cell migration from neuromasts to the mesenchymal layer<sup>33</sup>, would be necessary. Alternatively,  
367 the developmental relationship between dermal bones and neuromasts may be the other way  
368 around such that the developing dermal bones stimulate neuromast formation.

369

### 370 **3.3 | Development of the frontal bone in spotted gar at single-cell resolution**

#### 371 I ) *Asymmetric information in osteoblasts for frontal bone development*

372 While macroscopic observation of frontal bone formation in non-teleost and teleost  
373 actinopterygians has been conducted elsewhere<sup>16,29,33,66</sup>, description of the developmental process  
374 at the single-cell resolution is limited<sup>16</sup>. Our high-magnification observation of the developing  
375 frontal bone in spotted gar provides fundamental insights into the developmental process and  
376 underlying molecular mechanisms. After several mesenchymal cells aggregate, the cells start  
377 creating the inner space for bone matrix (Figure 5). This observation suggests that osteoblasts in  
378 mesenchymal condensations possess cell polarity and can establish “inside–outside” information  
379 of the condensations. In mesenchymal–epithelial transitions (MET), mesenchymal cells  
380 condense and autonomously obtain apicobasal information<sup>68</sup>. Although formation of  
381 mesenchymal condensations for cranial dermal bones significantly differs from MET, the  
382 osteoblast polarity information in the frontal bone anlage may be generated by similar molecular  
383 players such as *Zo*<sup>68</sup> or other cell–cell junction proteins. Gap junctions between mesenchymal  
384 cells are indispensable for osteoblast differentiation<sup>46</sup>. Thus, the proteins involved in gap  
385 junctions may establish the polarity information for condensing osteoblasts. Therefore, future  
386 work should investigate the localization of cell junction molecules in the condensing  
387 mesenchymal cells in spotted gar to understand how osteoblasts develop bone matrix inward.

388

#### 389 II ) *Osteoblasts articulate to the bone via podia*

390 After mesenchymal condensations are formed, the mineralized frontal bone extends along the  
391 anteroposterior axis. Intriguingly, we found that osteoblasts protrude podia to the bone matrix at  
392 extremities of the developing frontal bone (Figure 5D). A similar structure was briefly observed  
393 in osteoblasts in a cortical bone of the mouse tibia<sup>69</sup>, yet the detailed structure remains  
394 undescribed. Since all osteoblasts on the surface of the bone matrix possess podia connecting to  
395 the bone matrix, these podia potentially have critical functions in bone development, such as  
396 supplying phosphate or calcium, one of the main functions of osteoblasts during ossification<sup>70</sup>.  
397 Further, the polarity information from osteoblasts at the early stage may be carried over to later  
398 stages to instruct podia protrusion to the bone matrix. Further studies characterizing the structure  
399 of these podia using molecular staining for cytoskeletal proteins with high-resolution microscopy  
400 will promote understanding of this unique architecture and function.

401

### 402 **3.4 | Cytoskeletal and membranous changes in cell condensations**

403 Despite accumulating knowledge regarding molecular markers for the developing  
404 mesenchymal condensation<sup>47</sup>, the mechanisms that initiate mesenchymal cell condensations  
405 remain elusive. We stained the F-actin filaments and plasma membrane to monitor how the  
406 cytoskeleton and membrane architecture change during condensation development. Intriguingly,  
407 a couple of cells in the initial condensations showed high F-actin and plasma membrane staining  
408 (Figure 4). In cell–cell adhesion, intercellular proteins involved in cell–cell junctions (e.g., gap  
409 junctions or tight junctions) play major roles<sup>71</sup>. Thus, upregulation of F-actin may promote cell–  
410 cell adhesion among condensing mesenchymal cells via junction proteins. The stochastic  
411 upregulation of F-actin in a small subset of cells in mesenchymal condensations may support the  
412 existence of “initiators” that promote cell condensation (Figure 5B). Alternatively, upregulation  
413 of F-actin may occur in all condensing cells in a temporal manner but at different time points;  
414 our staining method may not have enough temporal resolution to detect this event.

415 Another possibility is that upregulation of F-actin controls osteoblast differentiation. F-  
416 actin plays a fundamental role in the differentiation of mesenchymal stem cells to osteoblasts via  
417 the Hippo-YAP pathway *in vitro*<sup>72</sup>. Thus, upregulation of F-actin in stochastic cells in spotted gar  
418 skull formation may be critical for osteoblast differentiation via cell–cell adhesion, which, in  
419 turn, induces osteoblast differentiation, potentially via the Hippo-YAP pathway.

420 Intriguingly, our results showed that the amount of plasma membrane was upregulated in  
421 the same cells with high F-actin signal. A previous study in rats showed that changes in  
422 membrane lipid composition control cell–cell adherence potency via regulation of junction  
423 proteins<sup>73</sup>. Thus, upregulation of the membrane phospholipid in mesenchymal condensations  
424 may promote cell–cell adhesion in parallel with upregulation of F-actin. We found that F-actin  
425 and phospholipid localization do not completely overlap in condensing mesenchymal cells,  
426 suggesting that upregulation of F-actin and phospholipids probably regulates cell condensation  
427 formation in an independent and cooperative manner.

428

### 429 **3.5 | Ancestral and conserved mechanisms of frontal bone development in basal** 430 **actinopterygians**

431 We identified initiation and growth processes of the frontal bone in spotted gar at single-  
432 cell resolution. Although the patterning of cranial dermal bones, including the frontal bone,  
433 diversified over 400 million years, the central facet of skull development seems to be conserved  
434 with myriad minor modifications to adapt to distinct habitats and functional necessity. Given the  
435 phylogenetically prominent position of gar in vertebrate evolution, the newly identified  
436 mechanisms, such as the upregulation of F-actin and plasma membrane or the podia from  
437 osteoblasts to the frontal bone, are likely conserved features of cranial bone development in other  
438 fish. Further research should test the conservation of these findings in other actinopterygian and  
439 teleost fish. Future studies to identify the upstream regulators of cytoskeleton and membrane  
440 changes, along with their functions, would illuminate fundamental mechanisms of cranial dermal  
441 bone development and evolution in vertebrates.

442

443

## 444 **4 | EXPERIMENTAL PROCEDURES**

445

### 446 **4.1| Animals**

447 Animal work was approved under Institutional Animal Care and Use Committee (IACUC)  
448 protocol #10/16-179-00 from Michigan State University. Spotted gar from the Louisiana  
449 population were spawned and raised as described previously (citation: PMID 24486528) with a  
450 few modifications. Embryos and larvae were raised up to the desired stages in plastic containers  
451 of increasing size in culture water made from RO water and Instant Ocean salt, at 18-20 degree  
452 Celsius, and with a light cycle of 12 hrs light/12 hrs dark. Later stages were fed artemia nauplii at  
453 least twice a day. At the target stages, gar embryos were euthanized by an overdose of tricaine  
454 and fixed in 4 % PFA, 10 % formalin, or Bouin's fixative at 4 degree Celsius overnight. The  
455 total length (TL) of each specimen was measured using a stereotype microscope (Leica M250)  
456 and associated software.

457

### 458 **4.2 | Acid-free Bone and cartilage staining**

459 Bone and cartilage staining without acetic acid was performed as previously described<sup>42</sup>. Prior to  
460 staining, specimens fixed in 10 % formalin were briefly rinsed in distilled H<sub>2</sub>O (dH<sub>2</sub>O) twice.  
461 The entrails of specimens were removed for large specimens by tweezers or a small slit was

462 carefully made at the ventral side of the body for small specimens in dH<sub>2</sub>O. Then, specimens  
463 were rinsed in dH<sub>2</sub>O on a rocker at room temperature overnight. The next day, specimens were  
464 equilibrated in 70 % ethanol solution and cartilages were stained in Alcian Blue 8 GX in 70 %  
465 ethanol / 50 mM MgCl<sub>2</sub> overnight. After the staining, specimens were equilibrated to dH<sub>2</sub>O  
466 through an ethanol : dH<sub>2</sub>O series (3:1, 1:1, 1:3) and immersed in a 1 % trypsin : 30 % saturated  
467 sodium borate solution until specimens became translucent. Subsequently, bones were stained in  
468 alizarin red solution (0.005 % Alizarin Red S powder in 1 % potassium hydroxide) on a shaker  
469 overnight. After bone staining, the specimens were bleached for one week in a solution (75 % of  
470 0.1 % potassium hydroxide in water and 25 % of glycerol). Specimens were transferred to 100 %  
471 glycerol through a 1 % potassium hydroxide : glycerol series (1:1, 1:3).

472

#### 473 **4.3 | Paraffin section and HE staining**

474 Bouin-fixed gar embryos were subjected to paraffin sectioning and HE staining. Longitudinal  
475 sections (8 μm) were made at 14 mm, 17 mm, 20 mm, 22 mm, and 25 mm TL stages by the  
476 Research Pathology Services at Rutgers University. The slides with mounted sections were then  
477 stained by Hematoxylin and Eosin solutions. The stained sections were enclosed by cover-  
478 glasses and then photographed by an Olympus BX63 (Imaging Core, Human Genetics Institute  
479 of New Jersey, Rutgers).

480

#### 481 **4.4 | 3D reconstruction of bone development in gar embryos**

482 The images of 35 serial HE stained sections at 17 mm, 20 mm and 25 mm TL stages were  
483 incorporated into 3D visualization and analysis software Amira (Thermo Fisher) and the  
484 positions of all sections were manually aligned. Then, the eye, endocranial cartilage, neuromasts,  
485 and frontal bone were manually segmented out, reconstructed to 3D, and pseudo-colored.

486

#### 487 **4.5 | Cell membrane and actin cytoskeletal staining**

488 Gar embryos fixed in 4 % PFA were soaked in a series of sucrose solutions (10 %, 15 %, 20 %)  
489 and embedded in OCT compound (Sakura tissue). Then, the OCT blocks were flash-frozen in  
490 liquid nitrogen. The cryosections were made at 8 μm thickness and mounted on slide glasses.  
491 Upon the removal of OCT compound in PBS with 0.1 % Triton X-100 (PBT), the sections were  
492 stained by Alexa Fluor™ 488 Phalloidin (1/1000 dilution, ThermoFisher Scientific), CellMask



493 (1/1000 dilution, ThermoFisher Scientific), and with DAPI (1/4000 dilution). After three brief  
494 washes in PBT, sections were covered by cover glasses with 50 % Glycerol and dH<sub>2</sub>O. Then, the  
495 staining signals for F-actin, phospholipids, and nuclei were photographed using a confocal  
496 microscope (Zeiss LSM 510).

497

#### 498 **4.6 | Quantification of nuclear size in mesenchymal cell condensations**

499 The confocal scanned images of mesenchymal condensations stained by F-actin, CellMask, and  
500 DAPI were loaded on ImageJ and surface area of nuclei was measured. For condensing cells and  
501 surrounding mesenchymal cells, 8 or 10 nuclei were quantified, respectively.

502

503

504

#### 505 **ACKNOWLEDGEMENTS**

506

507 This work was performed with the institutional support provided by the Rutgers University  
508 School of Arts and Sciences and the Human Genetics Institute of New Jersey (to T.N). We thank  
509 Solomon David and Allyse Ferrara (Nicholls State University) for their help with collecting gar  
510 broodstock and eggs as well as Camilla Peabody (Michigan State University) for help with gar  
511 embryo husbandry.

512

#### 513 **REFERENCES**

- 514 1. Hanken, J. & Thorogood, P. Evolution and development of the vertebrate skull: The role  
515 of pattern formation. *Trends in Ecology and Evolution* **8**, 9–15 (1993).
- 516 2. De Beer, G. *The development of the vertebrate skull*. (University of Chicago Press, 1985).
- 517 3. Philippe, J. *Norselaspis glacialis* n.g., n.sp, et les relations phylogénétiques entre les  
518 *kiaeraspidiens* (Osteostraci) du dévonien inférieur du Spitsberg. *Palaeovertebrata* **11**, 19–  
519 131 (1981).
- 520 4. Ritchie, A. & Gilbert-Tomlinson, J. First ordovician vertebrates from the southern  
521 hemisphere. *Alcheringa* **1**, 351–368 (1977).
- 522 5. White, E. I. X-The ostracoderm Pteraspis Kner and the relationships of the agnathous  
523 vertebrates. *Philos. Trans. R. Soc. Lond. B. Biol. Sci.* **225**, 381–457 (1935).

- 524 6. Zhu, M. *et al.* A Silurian placoderm with osteichthyan-like marginal jaw bones. *Nature*  
525 **502**, 188–193 (2013).
- 526 7. Zhu, M. *et al.* A Silurian maxillate placoderm illuminates jaw evolution. *Science* (80-. ).  
527 **354**, 334–336 (2016).
- 528 8. Stensiö, E. A. *On the Placodermi of the Upper Devonian of East Greenland II.*  
529 (København, 1948).
- 530 9. Goodrich, E. S. *Studies on the structure & development of vertebrates.* (MacMillan and  
531 Co., Limited, London, 1930).
- 532 10. Maddin, H. C., Piekarski, N., Sefton, E. M. & Hanken, J. Homology of the cranial vault in  
533 birds: new insights based on embryonic fate-mapping and character analysis. *R. Soc. Open*  
534 *Sci.* **3**, 160356 (2016).
- 535 11. Yoshida, T., Vivatbutstiri, P., Morriss-Kay, G., Saga, Y. & Iseki, S. Cell lineage in  
536 mammalian craniofacial mesenchyme. *Mech. Dev.* **125**, 797–808 (2008).
- 537 12. Kague, E. *et al.* Skeletogenic fate of zebrafish cranial and trunk neural crest. *PLoS One* **7**,  
538 e47394 (2012).
- 539 13. Evans, D. J. R. & Noden, D. M. Spatial relations between avian craniofacial neural crest  
540 and paraxial mesoderm cells. *Dev. Dyn.* **235**, 1310–1325 (2006).
- 541 14. Noden DM, S. R. Neural crest cells and the community of plan for craniofacial  
542 development: historical debates and current perspectives. in *Neural crest induction and*  
543 *differentiation* (ed. J-P, S.-J.) 1–23 (Landes Bioscience, 2006).
- 544 15. Jiang, X., Iseki, S., Maxson, R. E., Sucov, H. M. & Morriss-Kay, G. M. Tissue origins and  
545 interactions in the mammalian skull vault. *Dev. Biol.* **241**, 106–116 (2002).
- 546 16. Sire, J. Y. & Huysseune, A. Fine structure of the developing frontal bones and scales of  
547 the cranial vault in the cichlid fish *Hemichromis bimaculatus* (Teleostei, Perciformes).  
548 *Cell Tissue Res.* **273**, 511–524 (1993).
- 549 17. Stains, J. P. & Civitelli, R. Gap junctions in skeletal development and function.  
550 *Biochimica et Biophysica Acta - Biomembranes* **1719**, 69–81 (2005).
- 551 18. Green, K. J., Jaiganesh, A. & Broussard, J. A. Desmosomes: Essential contributors to an  
552 integrated intercellular junction network. *FI000Research* **8**, (2019).
- 553 19. Batra, N., Kar, R. & Jiang, J. X. Gap junctions and hemichannels in signal transmission,  
554 function and development of bone. *Biochimica et Biophysica Acta - Biomembranes* **1818**,

- 555 1909–1918 (2012).
- 556 20. Beyer, E. C. & Berthoud, V. M. Gap junction gene and protein families: Connexins,  
557 innexins, and pannexins. *Biochim. Biophys. Acta - Biomembr.* **1860**, 5–8 (2018).
- 558 21. Cabbage, C. C. & Mabee, P. M. Development of the cranium and paired fins in the  
559 zebrafish *Danio rerio* (Ostariophysi, Cyprinidae). *J. Morphol.* **229**, 121–160 (1996).
- 560 22. Kimmel, C. B., DeLaurier, A., Ullmann, B., Dowd, J. & McFadden, M. Modes of  
561 developmental outgrowth and shaping of a craniofacial bone in zebrafish. *PLoS One* **5**,  
562 (2010).
- 563 23. Hall, B. K. *Bones and cartilage: Developmental and evolutionary skeletal biology.* (2005).
- 564 24. Hanken, J. & Hall, B. K. *The Skull.* (University of Chicago Press, 1993).
- 565 25. Webb, J. F. & Shirey, J. E. Postembryonic development of the cranial lateral line canals  
566 and neuromasts in zebrafish. *Dev. Dyn.* **228**, 370–385 (2003).
- 567 26. Kapoor, A. S. Development of dermal bones related to sensory canals of the head in the  
568 fishes *Ophicephalus punctatus* Bloch (Ophicephalidae) and *Wallago attu* Bl.&Schn.  
569 (Siluridae). *Zool. J. Linn. Soc.* **49**, 69–95 (1970).
- 570 27. Wada, H., Iwasaki, M. & Kawakami, K. Development of the lateral line canal system  
571 through a bone remodeling process in zebrafish. *Dev. Biol.* **392**, 1–14 (2014).
- 572 28. Merrilees, M. J. Tissue interaction: Morphogenesis of the lateral-line system and labyrinth  
573 of vertebrates. *J. Exp. Zool.* **192**, 113–118 (1975).
- 574 29. Kanther, M. *et al.* Initiation and early growth of the skull vault in zebrafish. *Mech. Dev.*  
575 **160**, 103578 (2019).
- 576 30. Hall, B. K. The induction of neural crest-derived cartilage and bone by embryonic  
577 epithelia: an analysis of the mode of action of an epithelial-mesenchymal interaction.  
578 *Development* **64**, (1981).
- 579 31. Jollie, M. Development of cranial and pectoral girdle bones of *Lepisosteus* with a note on  
580 scales. *Copeia* **1984**, 476 (1984).
- 581 32. Aumonier, F. J. Development of the dermal bones in the skull of *Lepidosteus osseus*. *J.*  
582 *Cell Sci.* **s2-83**, (1941).
- 583 33. Pehrson, T. The development of dermal bones in the skull of *Amia calva*. *Acta Zool.* **21**,  
584 1–50 (1940).
- 585 34. Chang, C. T. & Franz-Odenaal, T. A. Perturbing the developing skull: Using laser

- 586 ablation to investigate the robustness of the infraorbital bones in zebrafish (*Danio rerio*).  
587 *BMC Dev. Biol.* **14**, (2014).
- 588 35. Bachler, M. & Neubüser, A. Expression of members of the Fgf family and their receptors  
589 during midfacial development. *Mech. Dev.* **100**, 313–316 (2001).
- 590 36. Fan, X. *et al.* Tissue interactions, cell signaling and transcriptional control in the cranial  
591 mesoderm during craniofacial development. *AIMS Genet.* **3**, 74–98 (2016).
- 592 37. Yu, K. *et al.* Conditional inactivation of FGF receptor 2 reveals an essential role for FGF  
593 signaling in the regulation of osteoblast function and bone growth. *Development* **130**,  
594 3063–3074 (2003).
- 595 38. Goodnough, L. H. *et al.* Distinct requirements for cranial ectoderm and mesenchyme-  
596 derived Wnts in specification and differentiation of osteoblast and dermal Progenitors.  
597 *PLoS Genet.* **10**, e1004152 (2014).
- 598 39. Cohen, M. M. The hedgehog signaling network. *Am. J. Med. Genet.* **123A**, 5–28 (2003).
- 599 40. Ferguson, J. W. & Atit, R. P. A tale of two cities: The genetic mechanisms governing  
600 calvarial bone development. *Genesis* **57**, (2019).
- 601 41. Braasch, I. *et al.* The spotted gar genome illuminates vertebrate evolution and facilitates  
602 human-teleost comparisons. *Nat. Genet.* **48**, 427–437 (2016).
- 603 42. Walker, M. B. & Kimmel, C. B. A two-color acid-free cartilage and bone stain for  
604 zebrafish larvae. *Biotech. Histochem.* **82**, 23–28 (2007).
- 605 43. Scherrer, R., Hurtado, A., Machado, E. G. & Debais-Thibaud, M. MicroCT survey of  
606 larval skeletal mineralization in the Cuban gar *Atractosteus tristoechus* (Actinopterygii;  
607 Lepisosteiformes). *MorphoMuseum* **3**, (2017).
- 608 44. Moodie, R. L. The influence of the lateral-line system on the peripheral osseous elements  
609 of fishes and amphibia. *J. Comp. Neurol.* **34**, 319–335 (1922).
- 610 45. Hall, B. K. & Miyake, T. The membranous skeleton: the role of cell condensations in  
611 vertebrate skeletogenesis. *Anatomy and Embryology* **186**, 107–124 (1992).
- 612 46. Jiang, J. X., Siller-Jackson, A. J. & Burra, S. Roles of gap junctions and hemichannels in  
613 bone cell functions and in signal transmission of mechanical stress. *Front. Biosci.* **12**,  
614 1450–1462 (2007).
- 615 47. Hall, B. K. & Miyake, T. Divide, accumulate, differentiate: Cell condensation in skeletal  
616 development revisited. *International Journal of Developmental Biology* **39**, 881–893

- 617 (1995).
- 618 48. Giffin, J. L., Gaitor, D. & Franz-Odenaal, T. A. The forgotten skeletogenic  
619 condensations: A comparison of early skeletal development amongst vertebrates. *Journal*  
620 *of Developmental Biology* **7**, (2019).
- 621 49. Metscher, B. D. & Ahlberg, P. E. Zebrafish in context: Uses of a laboratory model in  
622 comparative studies. *Developmental Biology* **210**, 1–14 (1999).
- 623 50. Rice, R., Rice, D. P. C., Olsen, B. R. & Thesleff, I. Progression of calvarial bone  
624 development requires Foxc1 regulation of Msx2 and Alx4. *Dev. Biol.* **262**, 75–87 (2003).
- 625 51. Schmidt, L., Taiyab, A., Melvin, V. S., Jones, K. L. & Williams, T. Increased FGF8  
626 signaling promotes chondrogenic rather than osteogenic development in the embryonic  
627 skull. *DMM Dis. Model. Mech.* **11**, (2018).
- 628 52. Sun, J., Ishii, M., Ting, M. C. & Maxson, R. Foxc1 controls the growth of the murine  
629 frontal bone rudiment by direct regulation of a Bmp response threshold of Msx2. *Dev.*  
630 **140**, 1034–1044 (2013).
- 631 53. Bitar, M. *et al.* Effect of cell density on osteoblastic differentiation and matrix degradation  
632 of biomimetic dense collagen scaffolds. *Biomacromolecules* **9**, 129–135 (2008).
- 633 54. Pinganaud-Perrin, G. Effets de l’ablation de l’œil sur la morphogenèse du chondrocrâne et  
634 du crâne osseux de *Salmo irideus* Gib. *Acta Zool.* **54**, 209–221 (1973).
- 635 55. McBeath, R., Pirone, D. M., Nelson, C. M., Bhadriraju, K. & Chen, C. S. Cell shape,  
636 cytoskeletal tension, and RhoA regulate stem cell lineage commitment. *Dev. Cell* **6**, 483–  
637 495 (2004).
- 638 56. Kilian, K. A., Bugarija, B., Lahn, B. T. & Mrksich, M. Geometric cues for directing the  
639 differentiation of mesenchymal stem cells. *Proc. Natl. Acad. Sci. U. S. A.* **107**, 4872–7  
640 (2010).
- 641 57. Misra, J. R. & Irvine, K. D. The Hippo signaling network and its biological functions.  
642 *Annu. Rev. Genet.* **52**, 65–87 (2018).
- 643 58. Sun, S. & Irvine, K. D. Cellular organization and cytoskeletal regulation of the Hippo  
644 signaling network. *Trends Cell Biol.* **26**, 694–704 (2016).
- 645 59. Halder, G., Dupont, S. & Piccolo, S. Transduction of mechanical and cytoskeletal cues by  
646 YAP and TAZ. *Nature Reviews Molecular Cell Biology* **13**, 591–600 (2012).
- 647 60. Pocaterra, A., Romani, P. & Dupont, S. YAP/TAZ functions and their regulation at a

- 648 glance. *J. Cell Sci.* **133**, (2020).
- 649 61. Pan, J.-X. *et al.* YAP promotes osteogenesis and suppresses adipogenic differentiation by  
650 regulating  $\beta$ -catenin signaling. *Bone Res.* **6**, 18 (2018).
- 651 62. Stricker, J., Falzone, T. & Gardel, M. L. Mechanics of the F-actin cytoskeleton. *J.*  
652 *Biomech.* **43**, 9–14 (2010).
- 653 63. Pehrson, T. Some points in the cranial development of teleostomian fishes. *Acta Zool.* **3**,  
654 1–63 (1922).
- 655 64. Allis, E. P. On the morphology of certain of the bones of the cheek and snout of *Amia*  
656 *calva*. *J. Morphol.* **14**, 425–466 (1898).
- 657 65. Stanley Westoll, T. Latero-sensory canals and dermal bones [6]. *Nature* **148**, 168 (1941).
- 658 66. Moy-Thomas, J. A. Development of the frontal bones of the rainbow trout. *Nature* **147**,  
659 681–682 (1941).
- 660 67. Powers, A. K., Boggs, T. E. & Gross, J. B. Canal neuromast position prefigures  
661 developmental patterning of the suborbital bone series in *Astyanax* cave- and surface-  
662 dwelling fish. *Dev. Biol.* **441**, 252–261 (2018).
- 663 68. Pei, D., Shu, X., Gassama-Diagne, A. & Thiery, J. P. Mesenchymal–epithelial transition  
664 in development and reprogramming. *Nature Cell Biology* **21**, 44–53 (2019).
- 665 69. Sato, C. *et al.* Calcium phosphate mineralization in bone tissues directly observed in  
666 aqueous liquid by atmospheric SEM (ASEM) without staining: microfluidics  
667 crystallization chamber and immuno-EM. *Sci. Rep.* **9**, 1–13 (2019).
- 668 70. Blair, H. C. *et al.* Osteoblast differentiation and bone matrix formation in vivo and in  
669 vitro. *Tissue Engineering - Part B: Reviews* **23**, 268–280 (2017).
- 670 71. Jamora, C. & Fuchs, E. Intercellular adhesion, signalling and the cytoskeleton. *Nature*  
671 *Cell Biology* **4**, E101–E108 (2002).
- 672 72. Pan, J.-X. *et al.* YAP promotes osteogenesis and suppresses adipogenic differentiation by  
673 regulating  $\beta$ -catenin signaling. *Bone Res.* **6**, 18 (2018).
- 674 73. Márquez, M. G., Favale, N. O., Leocata Nieto, F., Pescio, L. G. & Sterin-Speziale, N.  
675 Changes in membrane lipid composition cause alterations in epithelial cell-cell adhesion  
676 structures in renal papillary collecting duct cells. *Biochim. Biophys. Acta - Biomembr.*  
677 **1818**, 491–501 (2012).
- 678 74. Grande, L. *An empirical synthetic pattern study of gars (Lepisosteiformes) and closely*

679 *related species, based mostly on skeletal anatomy : the resurrection of Holostei.*  
680 (American Society of Ichthyologists and Herpetologists (ASIH), 2010).

681  
682  
683  
684

## 685 **Figure legends**

686

### 687 **Figure 1. The developmental process of gar skull bones.**

688

689 A, C, E, G, and I; the dorsal views of acid-free bone and cartilage staining on 21 mm (A), 25 mm  
690 (C), 28 mm (E), 42 mm (G), and 49 mm (I) TL stage gar juveniles. B, D, F, H, and J; the lateral  
691 views of the same juveniles as A, C, E, G, and I. B', D', F', H', and J'; the magnification of the  
692 frontal bone domains in B, D, F, H, and J. At 21 mm TL stage (A, B, and B'), there is no  
693 evidence of ossification of the frontal bone (f). The ossification of jaw bones, including  
694 premaxilla (pmx), dentary (den), and ectopterygoid (ect) bones are discerned. Parasphenoid (pas)  
695 starts to ossify. The cleithrum (cl), supracleithrum (scl), and extrascapular (es) develop at the  
696 posterior to the head. At 25 mm TL stage (C, D, and D'), the frontal bone (f) began to ossify at  
697 dorsal to the eye. The premaxillary, dentary, and ectopterygoid bones are further ossified. The  
698 posterior end of premaxillary and the anterior end of the frontal bone has a gap between them  
699 (C). At 28 mm TL stage (E, F, and F'), the frontal bone extends to the anterior direction. The  
700 posterior end of the premaxillary bone and the anterior end of the frontal bone is still separated  
701 by a small gap. Several lacromaxillary (lmx) bones are discerned at the lateral to the  
702 ectopterygoid bone. At 42 mm TL stage (G, H, and H'), the frontal bone continues to grow  
703 anteriorly and posteriorly. The posterior end of the frontal bone is located at the lateral to the  
704 developing parietal bone (pa) (G and H', white arrow). Parietal bones develop from the separated  
705 ossification centers. The supratemporal (spt) bone is observed posterior to the frontal bone (H').  
706 At 49 mm TL stage (I, J, and J'), the premaxillary and frontal bones cover the anterior medial  
707 part of the skull. The separated parietal bones fuse with each other and expand, covering the top  
708 of the skull. White arrows in H' and J' indicate the posterior extremity of the frontal bone. Ang;  
709 angular, br; branchiostegals, cha; anterior ceratohyal, cl; ceithrum, den; dentary, ect;

710 ectopterygoid, es; extrascapular, f; frontal, lmx; lacrimomaxilla, mx; maxilla, n; nasal, oto;  
711 otolith, pa; parietal, pas; parasphenoid, pmx; premaxilla, pop; preopercle, qj; quadroratojugal, r;  
712 rostral bone, sct; supracleithrum, spt; supratemporal, and pt; posttemporal. Anatomical  
713 terminology is based on Grande, L., 2010<sup>74</sup>. Scale bars are 5 mm.

714

715 **Figure 2. Topological relationships among the neuromasts, endocranial cartilage, and**  
716 **frontal bone.**

717

718 A, B, and C; the dorsomedial views of 3D reconstruction of the eye regions of gar skull at 17  
719 mm (A), 20 mm (B), and 25 mm (C) TL stages. A', B', and C'; the dorsal views of the same  
720 juveniles of A, B, and C. At 17 mm TL stage (A and A'), the frontal bone anlage (f) is located  
721 dorsally to the endocranial cartilage (c). Although the neuromasts and the frontal bone anlage  
722 develop in a close proximity, their positions do not completely match (A'). At 20 mm TL stage,  
723 the frontal bone anlage anteriorly extends and cover the supraorbital cartilage above the eye (B  
724 and B'). The dorsal view of the developing neuromasts and frontal bone showed that the frontal  
725 bones do not develop exactly at the ventral to the neuromasts. At 25 mm TL stage, the frontal  
726 bone expands anteriorly and posteriorly (C and C'). While the frontal bone forms under the  
727 neuromasts, it also extends laterally without neuromasts (C'). The scale bars are 0.2 mm. n;  
728 neuromasts, e; eye, c; endocranial cartilage, and f; frontal bone.

729

730 **Figure 3. Developmental process of the frontal bone at single-cell resolution**

731

732 A-C; 14 mm TL, D- I; 17 mm TL, J-L; 20 mm TL, and M-O; 25 mm TL stages. A; at 14 mm TL  
733 stage, no mesenchymal condensations are discerned above the endocranial cartilage (c) and the  
734 eye (e). B; the enlarged image of A for showing mesenchymal cells above the endocranial  
735 cartilage. C; the enlarged image of mesenchymal cells above the eye. Mesenchymal cells are  
736 stretched and connected via podia. D; at 17 mm TL stage, the frontal bone (f) develops dorsally  
737 to the supraorbital cartilage (c). The frontal bone is in a close proximity to a neuromast (n). E;  
738 the enlarged image of the dotted rectangle in D. The thin bone matrix (b) is surrounded by  
739 compact osteoblasts (o). F; The more lateral side of the embryos shows the initiation of the  
740 mesenchymal cell condensation for the frontal bone (f). The estimated position of the section is



741 indicated in Figure 2. G; the enlarged image of the dotted rectangle in F. The mesenchymal cells  
742 aggregate with each other establishing a dorsoventrally single-cell layer condensation. H and I;  
743 the other sections of different embryos at 17 mm TL stage showed the different phases of the  
744 frontal bone development. The inner space for mineralization is created (arrows in H), and bone  
745 matrix is confirmed in the cell condensation (I). J; at 20 mm TL stage, the frontal bone anteriorly  
746 extends. K and L; zoomed in images of the bone above the endocranial cartilage (K) and the  
747 anterior extremity of the bone (L). Thin and stretched osteoblasts surround the extremity of the  
748 frontal bone. M; at 25 mm TL stage, the frontal bone further extends along the anteroposterior  
749 axis. N; the enlarged image shows that the osteoblasts surround the bone matrix. O; at the  
750 extremity of the bone, osteoblasts extend the podia to the bone (arrows). The inset shows the  
751 podia between the osteoblast and bone. Scales are the same in A, D, J and M (scale bar is 10  $\mu\text{m}$ )  
752 and in B, C, E, F, H, I, K, L, N and O (scale bar is 100  $\mu\text{m}$ ). b; bone matrix, c; endocranial  
753 cartilage, e; eye, f; frontal bone, and o; osteoblasts.

754

755 **Figure 4. Alteration of F-actin and phospholipids organization during the cell**  
756 **condensation formation**

757 A-D; F-actin staining (Phalloidin) (A), and the merged image of F-actin, phospholipids  
758 (CellMask), and nucleus (DAPI) staining (B-D) in the mesenchymal cell condensation at 17 mm  
759 TL stage. Among the condensing cells, some cells showed strong F-actin and phospholipid  
760 staining (arrowheads). B, C, and D show the sections of different individuals. Note that the  
761 localization of the cells with enriched F-actin is random in the mesenchymal condensations. E-H;  
762 high-magnification observation of the mesenchymal cell condensation. The nuclei in the  
763 aggregating cells become compact and the chromatins are unevenly distributed in the nuclei (E,  
764 inset). In the mesenchymal condensation, some random cells showed significantly higher  
765 staining of both phospholipids (F) and F-actin (G) than others. The localization of the  
766 upregulated F-actin and phospholipids do not colocalize in the cells (the inset in H). Scale bars  
767 are 100  $\mu\text{m}$  in A and 10  $\mu\text{m}$  in E. I; the comparison of the nuclear size (surface area) between  
768 mesenchymal cells and condensing cells (t-test,  $p=0.045$ ).  
769

769

770 **Figure 5. Developmental landmarks of the frontal bone in spotted gar**

771 A; before the formation of the mesenchymal condensations. The mesenchymal cells stretch and  
772 protrude multiple podia from the cell bodies. B; when the mesenchymal cells aggregate, a couple  
773 of random cells in the condensation display the upregulation of F-actin and phospholipids  
774 (green). These cells may promote the condensation process or stimulate osteoblast  
775 differentiation. C; The mesenchymal condensations produce bone matrix inside. The osteoblasts  
776 may have “inside-outside” positional information. D; as the frontal bone grows, osteoblasts  
777 protrude podia to the bone matrix. These podia may supply calcium or other minerals to the bone  
778 matrix and regulate bone growth.

779

780

781

782

### 783 **Supplementary Information**

784

#### 785 **Supplementary Figure 1. The topological relationship among the neuromasts, endocranial** 786 **cartilage, and frontal bone at the peripheral side of the juveniles.**

787

788 A, B, and C; the dorsolateral views of 3D reconstruction at 14 mm (A), 17 mm (B), and 20 mm  
789 (C) TL stages. A', B', and C'; the dorsal views of the same juveniles of A, B, and C. At 14 mm  
790 TL stage, the frontal bone anlage is not observed (A and A'). At 17 mm TL stage, compared to  
791 the developing frontal bone at the medial part of the juveniles (Figure 2), the several  
792 mesenchymal cells start to aggregate and produce the mesenchymal condensations (f) at the  
793 peripheral side (B). The condensation occurs in a close proximity to the neuromasts (n), but  
794 condensations are located between two neuromasts in the mesenchymal layer (B'). At 20 mm TL  
795 stage, the frontal bone at the peripheral side starts to expand anteriorly and posteriorly (C and  
796 C'). While the frontal bone forms under the neuromasts, it anteriorly and laterally expands  
797 without neuromasts (C'). The scale bars are 0.2 mm. c; endocranial cartilage, e; eye, f; frontal  
798 bone, and n; neuromasts.

799

800

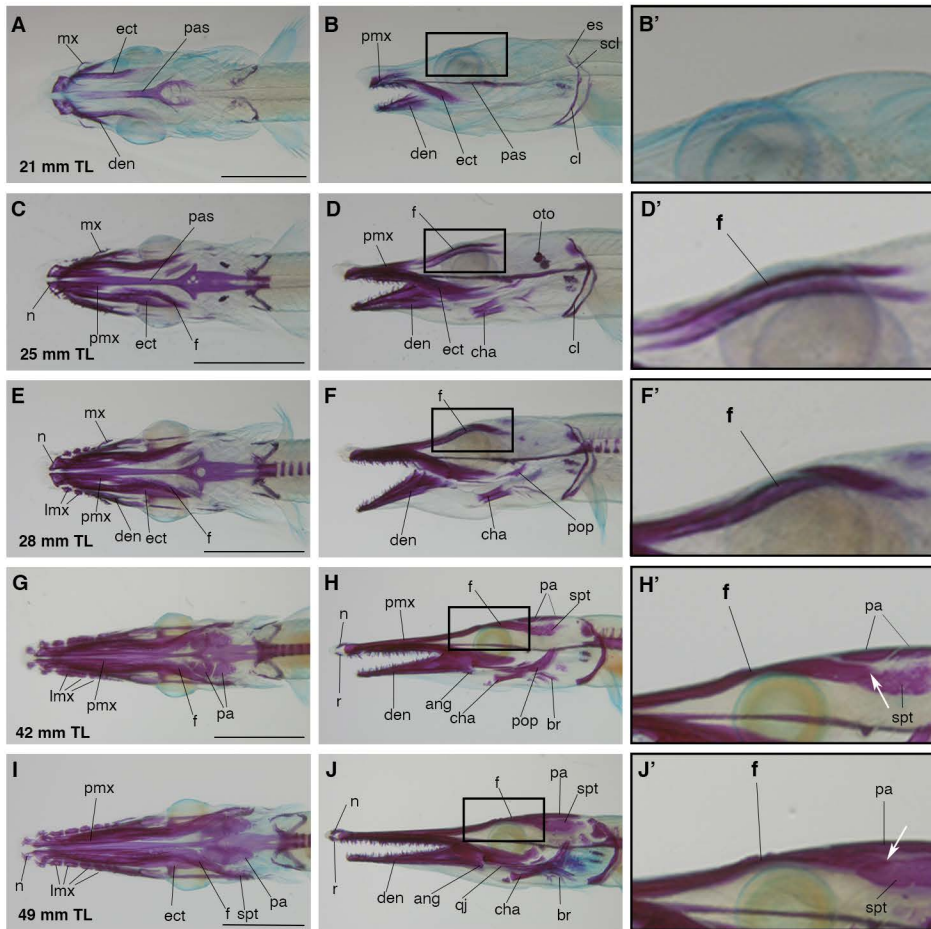

**Figure 1**

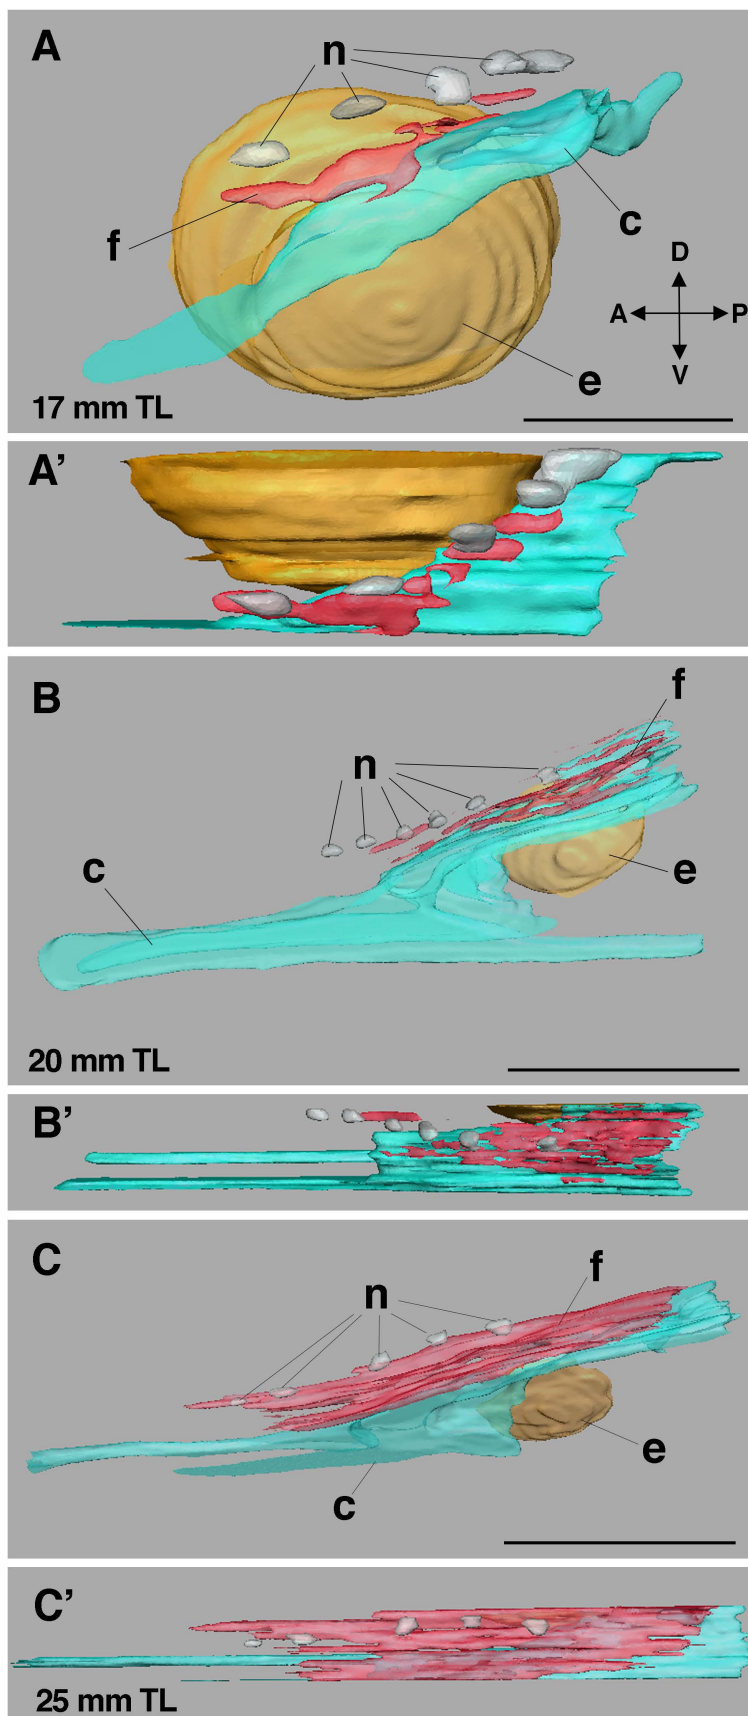

**Figure 2**

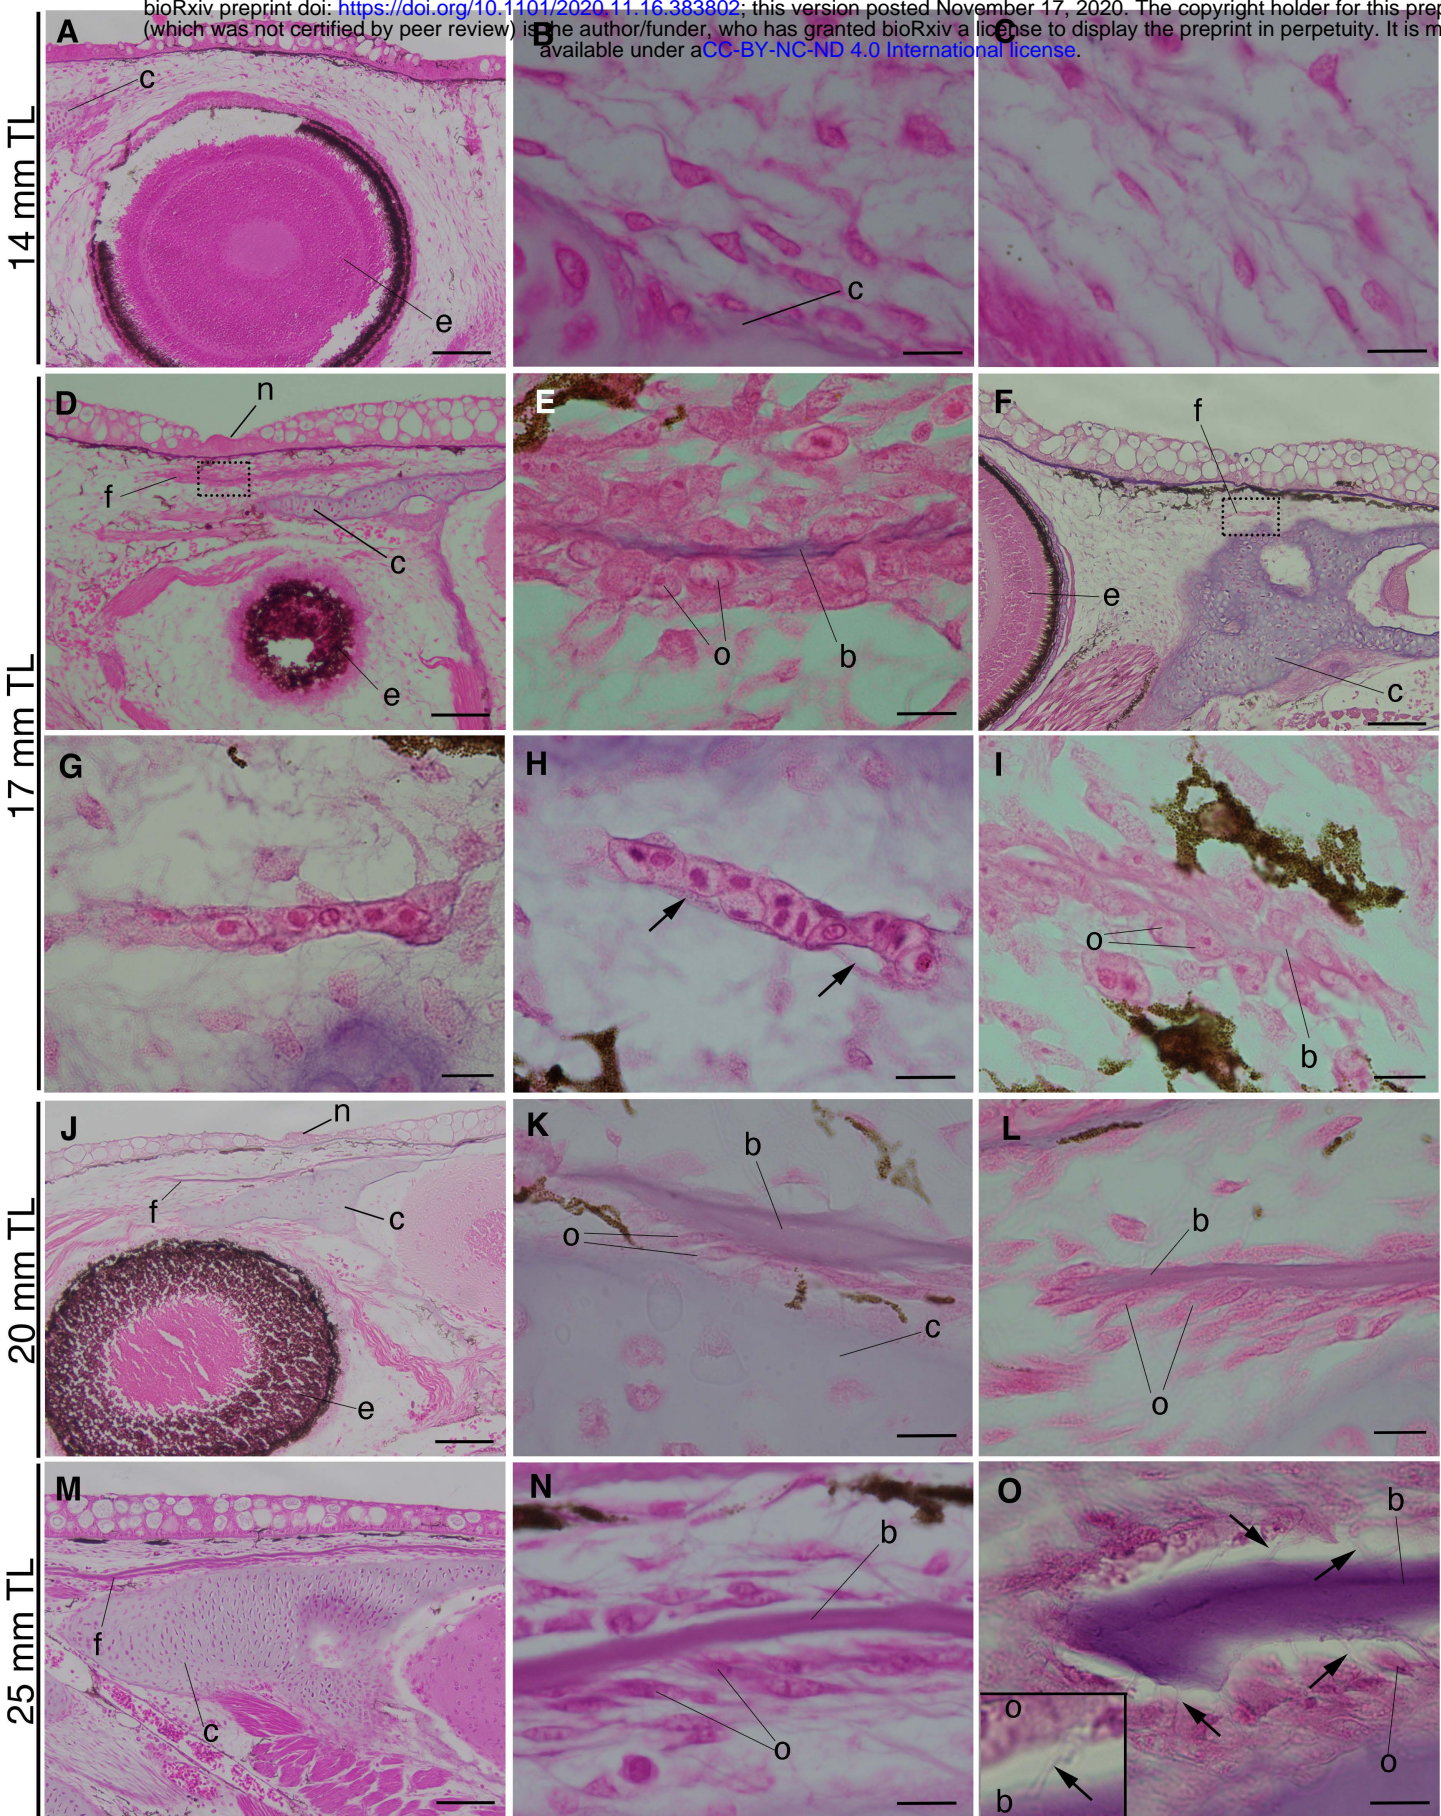

**Figure 3**

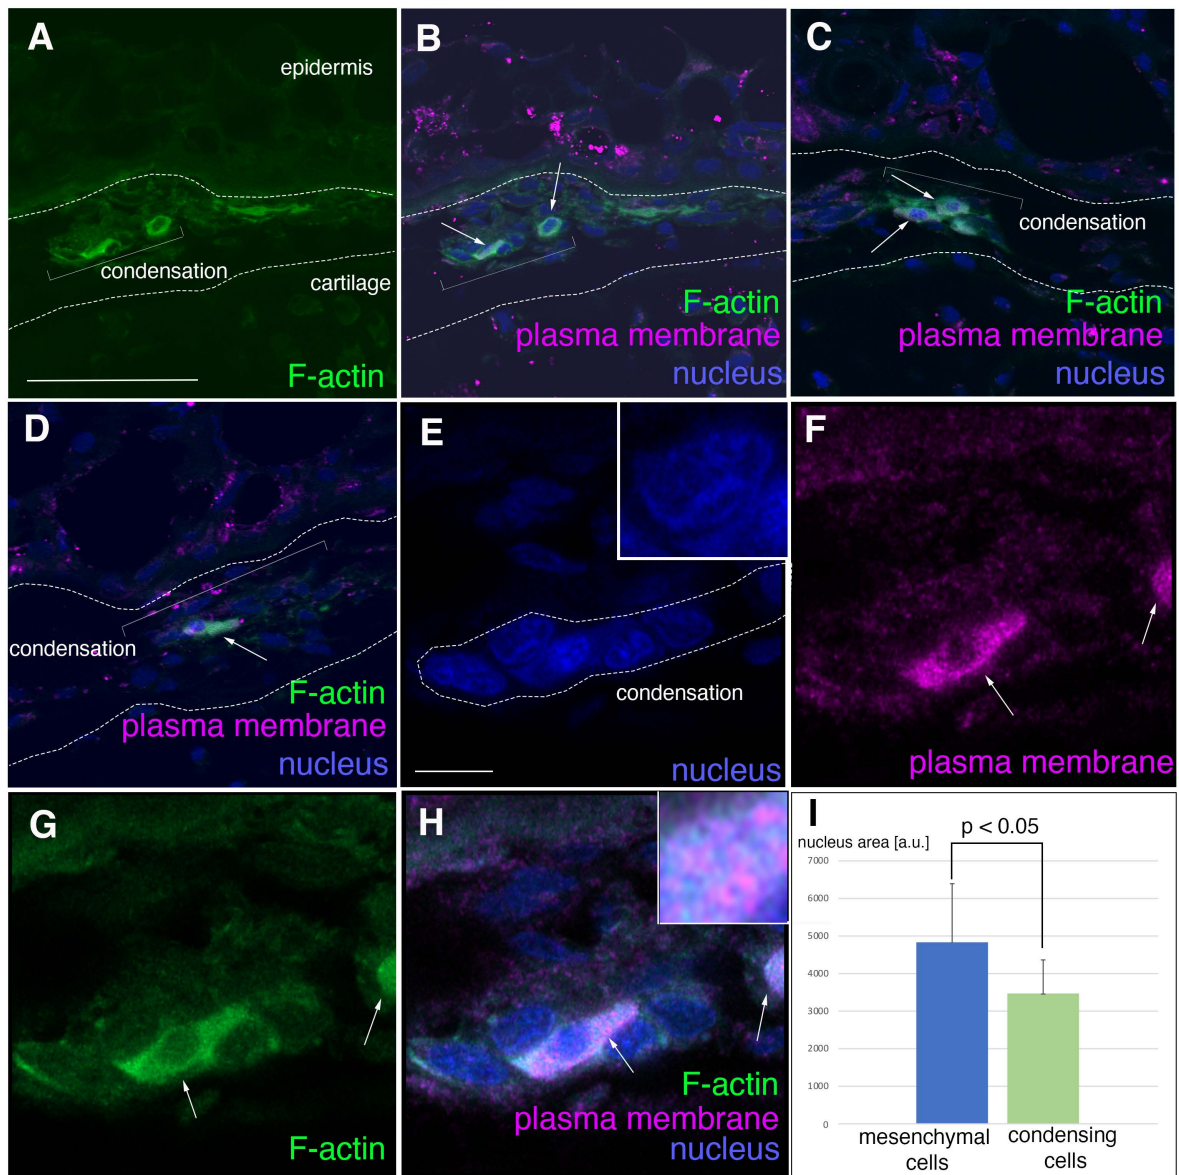

Figure 4

**A** before the condensation (14 mm TL)

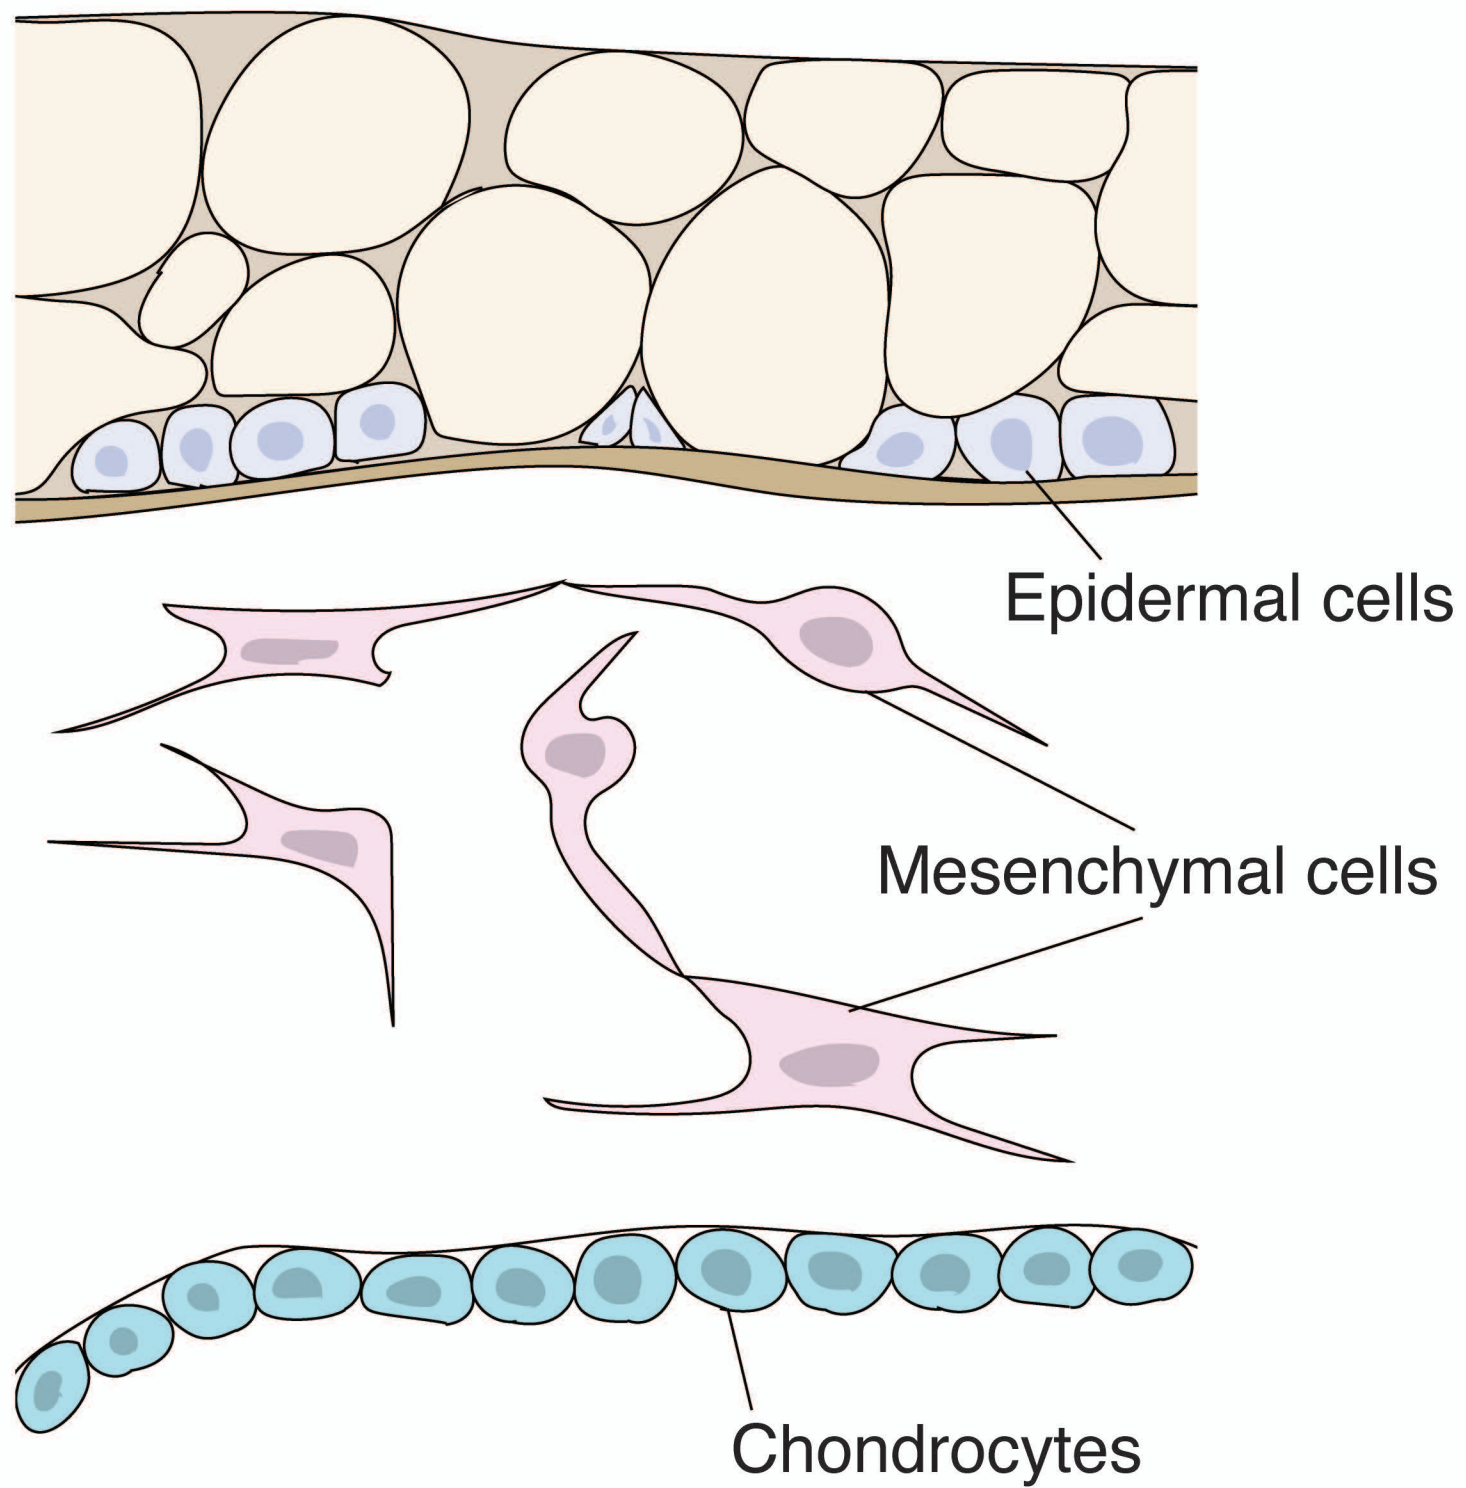

**B** initiation of the condensation (17 mm TL)

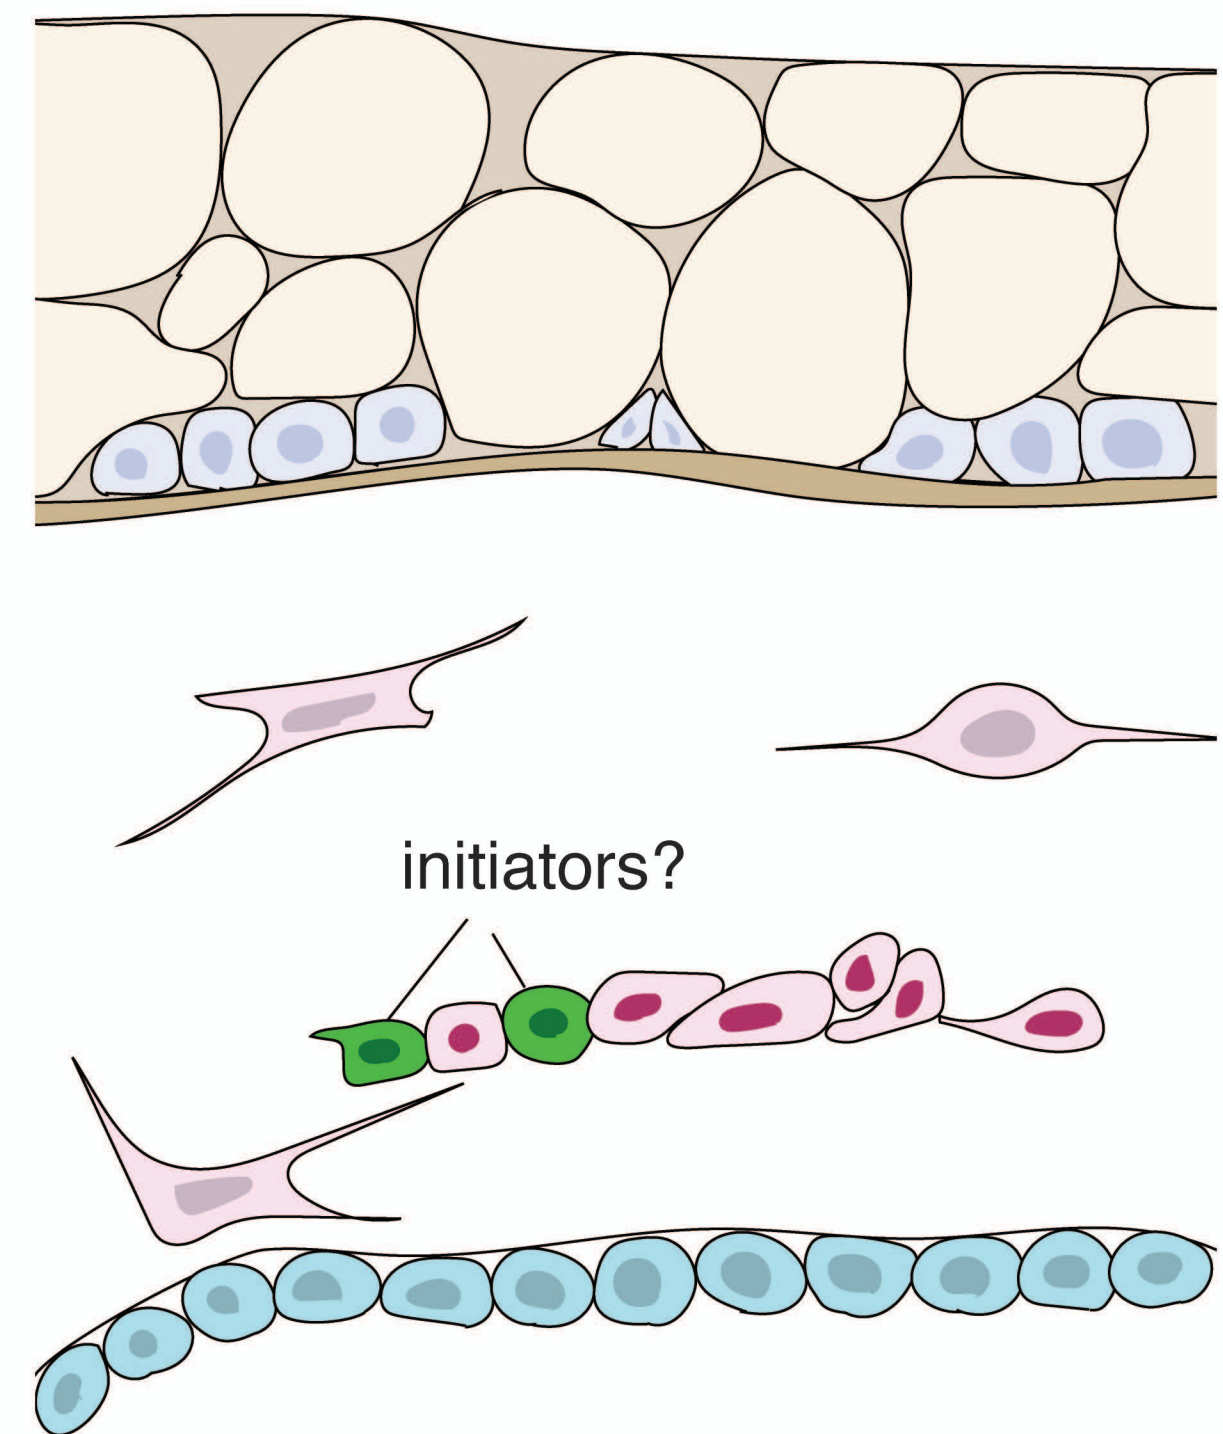

bioRxiv preprint doi: <https://doi.org/10.1101/2020.11.16.383802>; this version posted November 17, 2020. The copyright holder for this preprint (which was not certified by peer review) is the author/funder, who has granted bioRxiv a license to display the preprint in perpetuity. It is made available under aCC-BY-NC-ND 4.0 International license.

**C** initiation of the mineralization (17 mm TL)

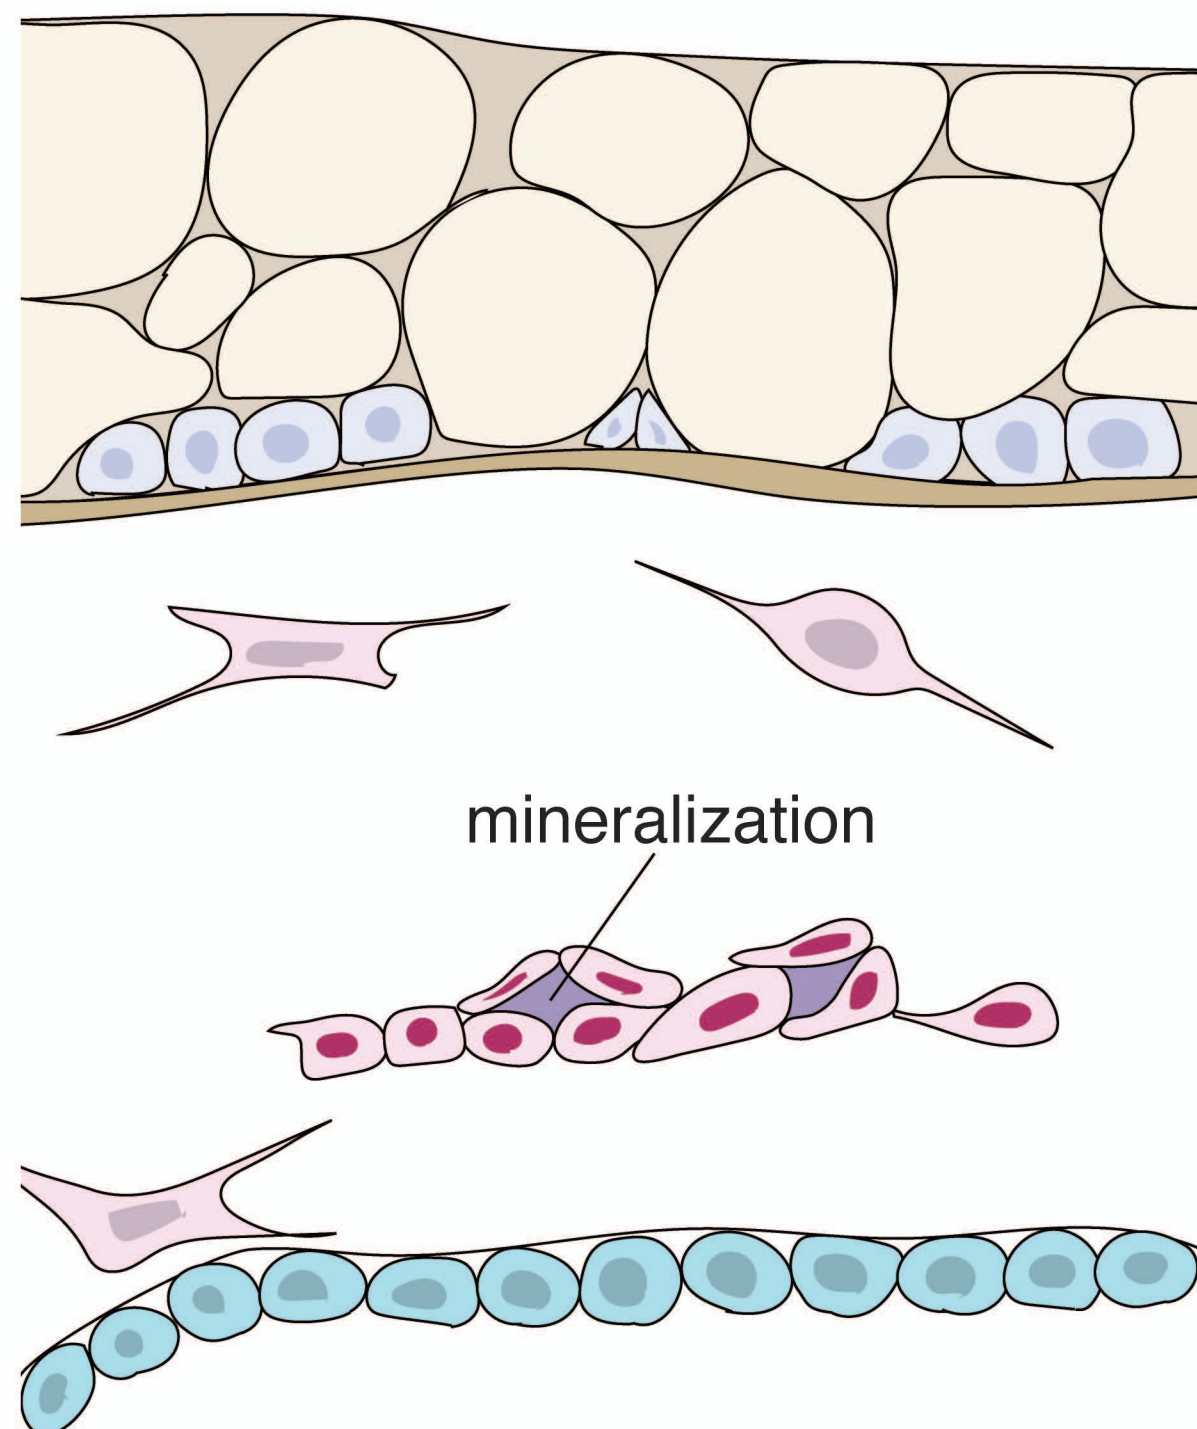

**D** extension of the frontal bone (20 mm TL)

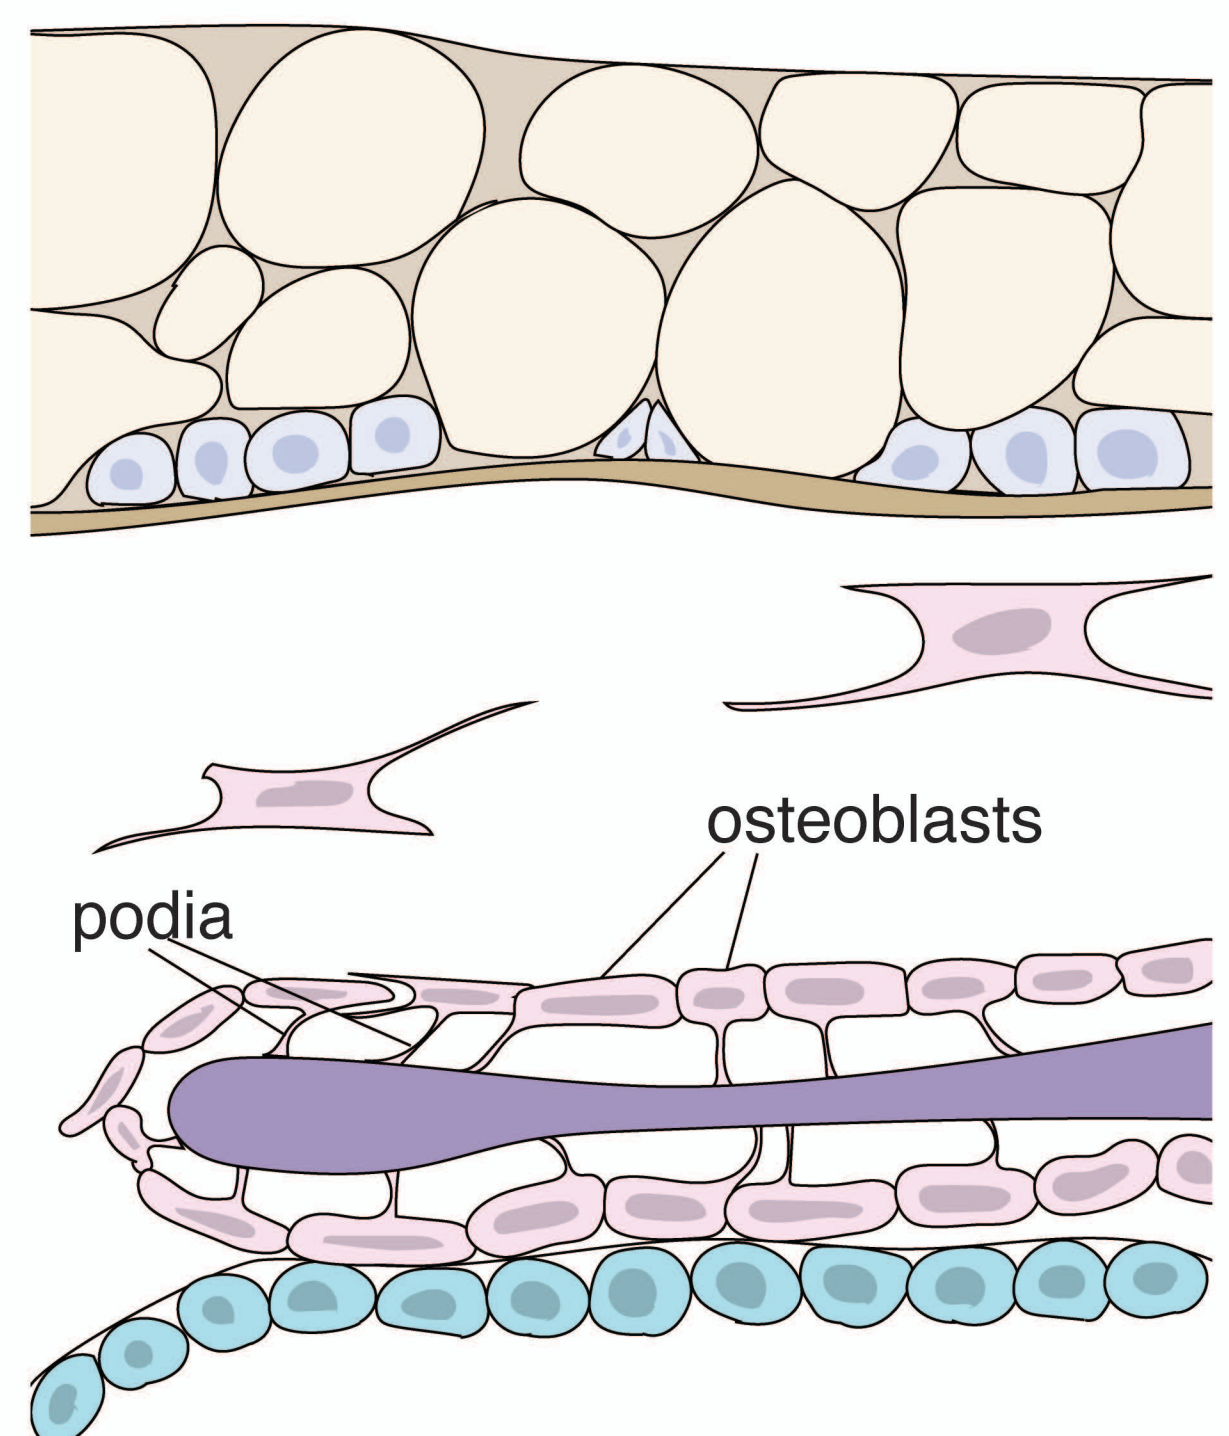

**Figure 5**

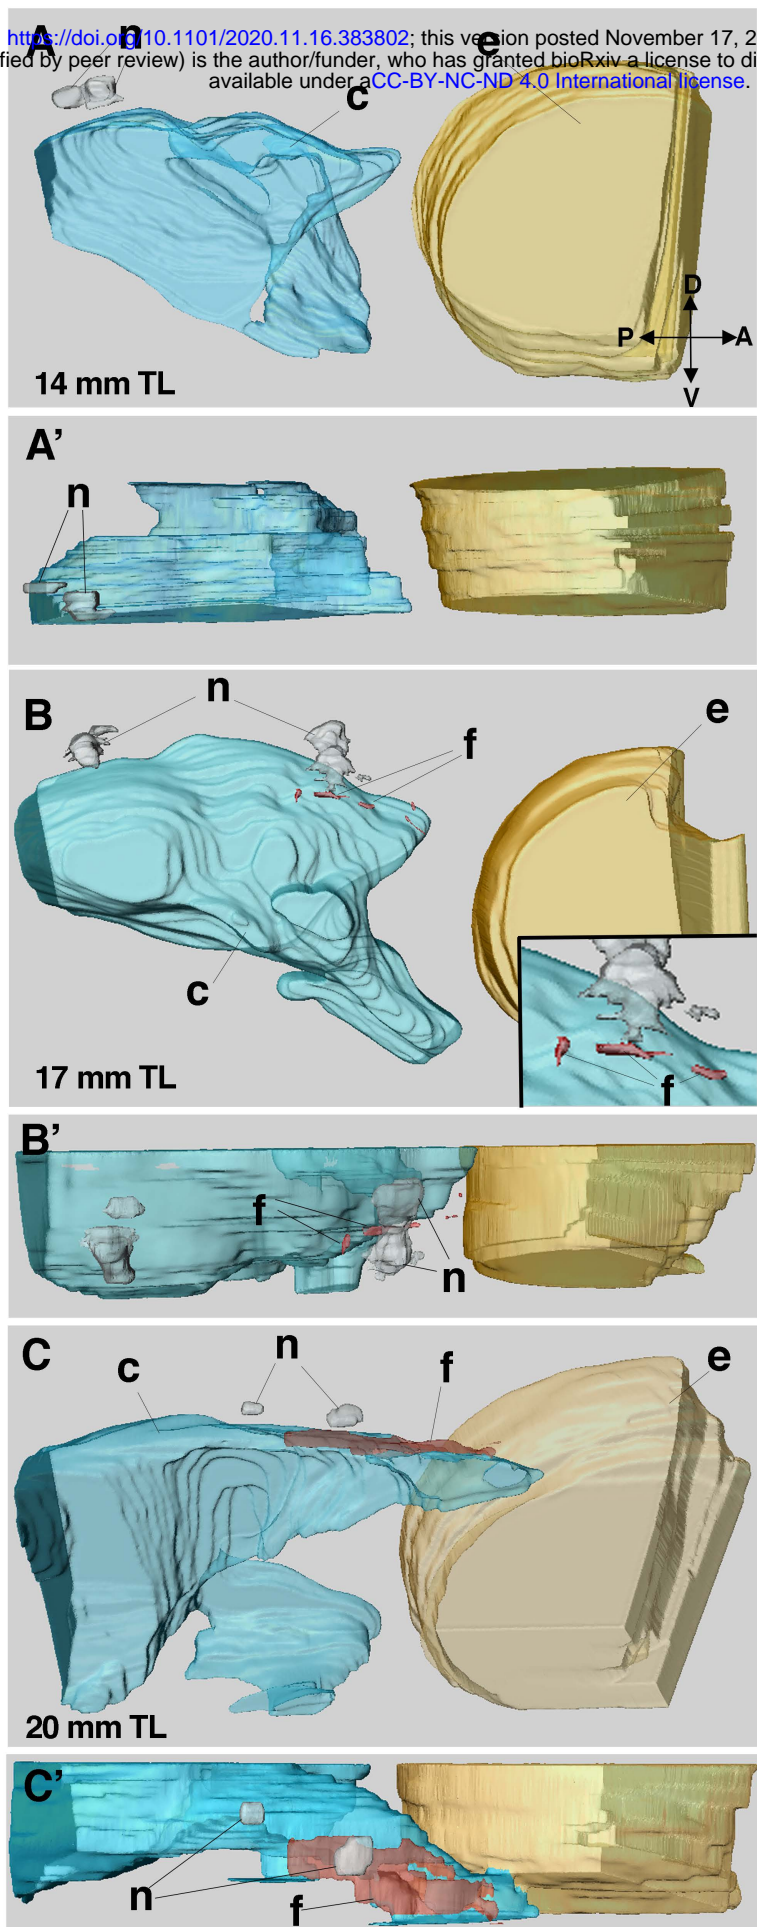

Supplementary Figure 1
